# Supplementary material for: Design of efficient non-doped blue emitters: toward the improvement of charge transport
Source: Royal Society of Chemistry journal article supplement (doi:10.1039/c9ra04918e), 2019-01-01
Supplement: c9ra04918e1.pdf [file c9ra04918e1.pdf]

## Supplementary Information

### Table of Contents

**Fig. S1** The investigation of rotational potential energy surface of **1-10**. The red arrow indicates the dihedral angles of optimized structures of **1-10**.

**Table S1** The results of HOMO, LUMO,  $\lambda_{\text{abs}}$ , and  $\lambda_{\text{emi}}$  of **Cz3PhAn** depending on the DFT functionals and basis sets.

**Table S2** The cartesian coordinates of optimized structures of **1-10**. The units are in Å.

Fig. S1

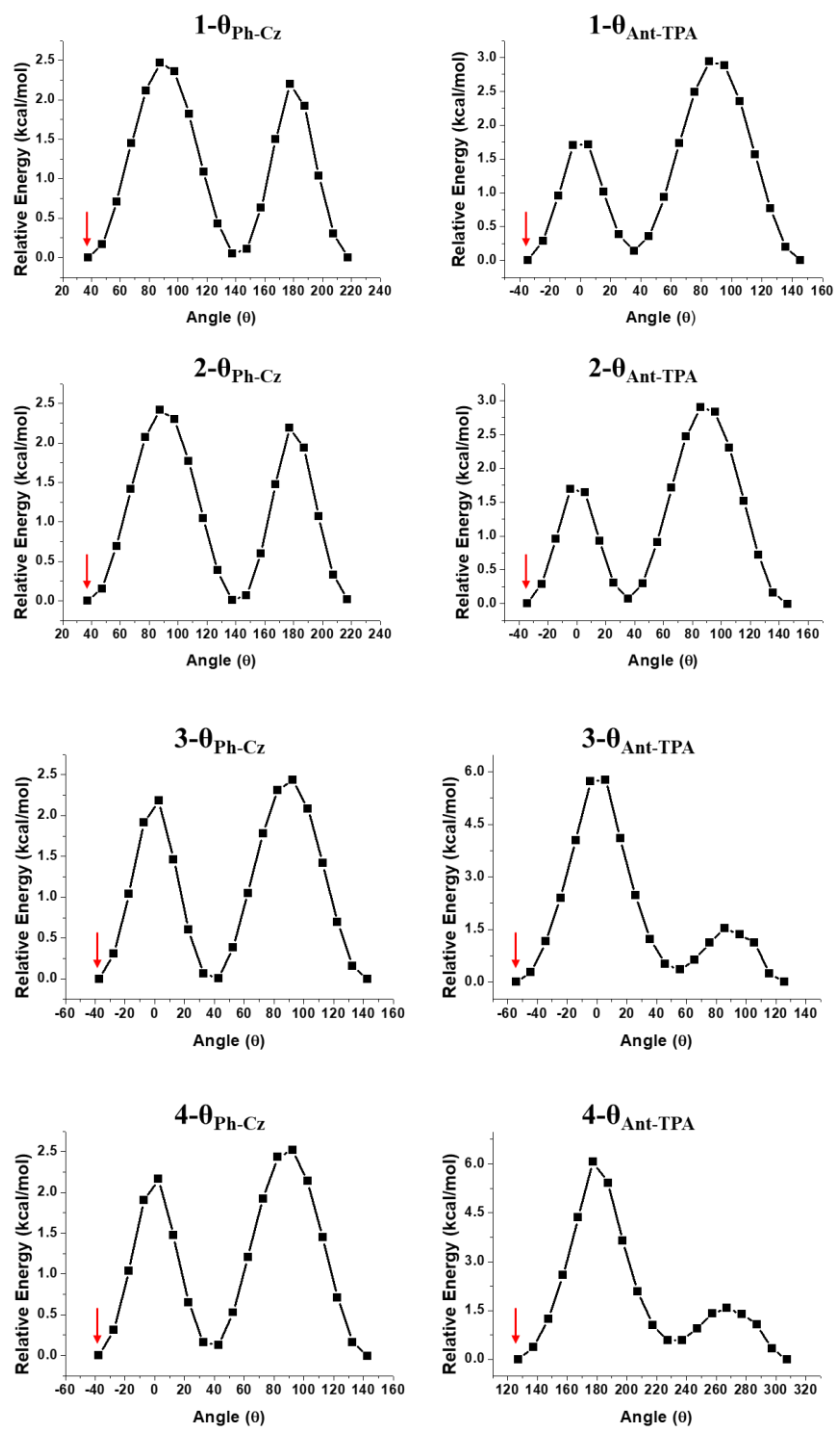

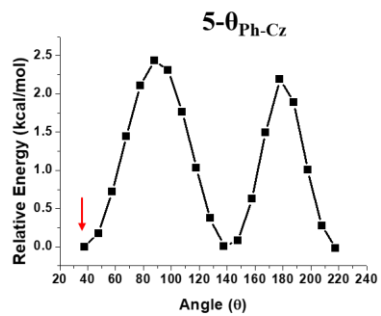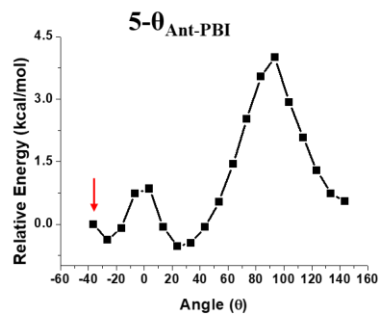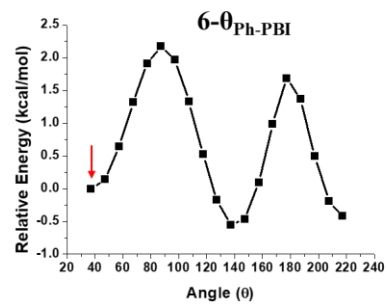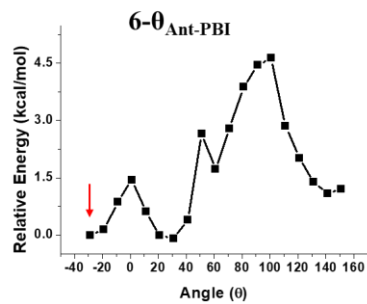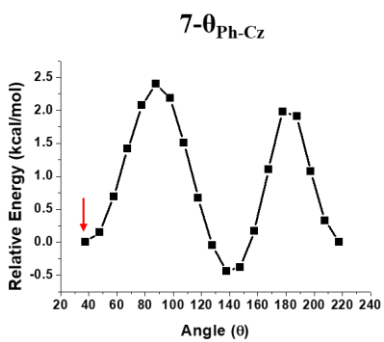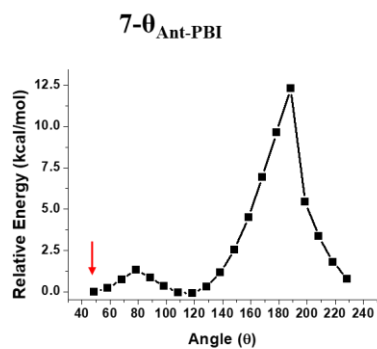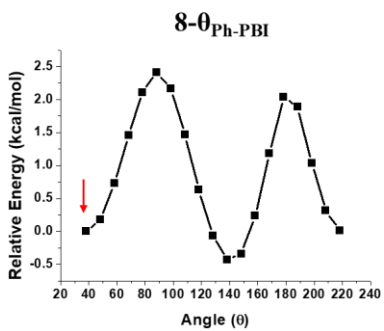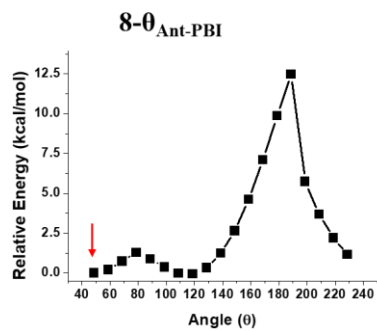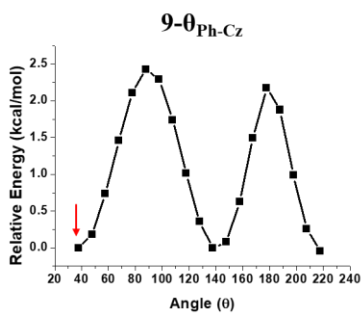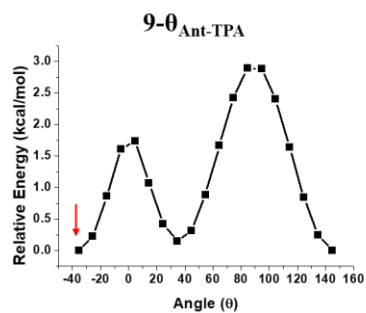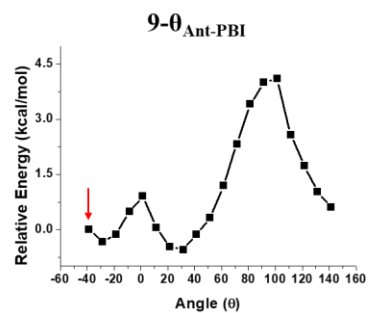

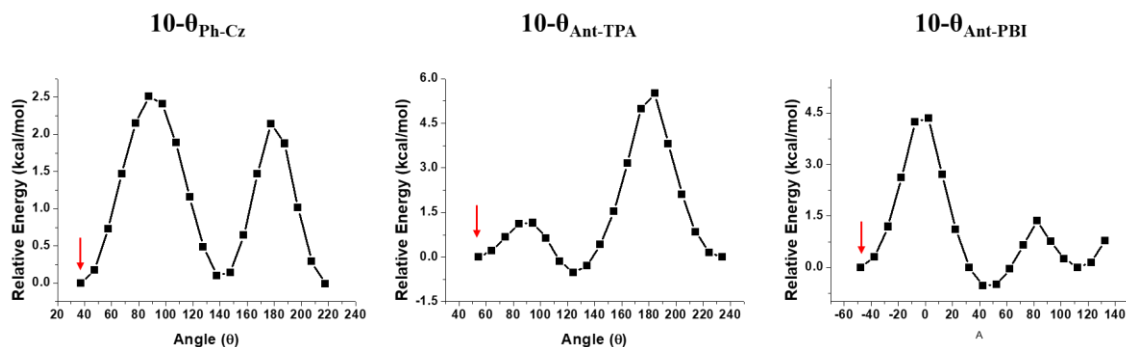

**Table S1**

|                   | $E_{\text{HOMO}}$<br>(eV) | $E_{\text{LUMO}}$ (eV) | $\lambda_{\text{abs}}$ (nm) | $\lambda_{\text{em}}$ (nm) |
|-------------------|---------------------------|------------------------|-----------------------------|----------------------------|
| Experiment        | -5.52                     | -2.73                  | 359                         | 440                        |
| b3lyp/6-31G*      | -4.99                     | -1.51                  | 298.71                      | 507.67                     |
| b3lyp/6-311G*     | -5.51                     | -2.03                  | 302.7                       | 510.86                     |
| cam-b3lyp/6-31G*  | -6.48                     | -0.61                  | 353.86                      | 445.9                      |
| cam-b3lyp/6-311G* | -6.75                     | -0.88                  | 357.22                      | 450.21                     |

**Table S2**

| <b>1</b> |             |             |             |
|----------|-------------|-------------|-------------|
| C        | -2.11265300 | -5.68400900 | 0.21648300  |
| C        | -2.69323500 | -4.45956000 | 0.08838200  |
| C        | -1.91028700 | -3.26066900 | 0.06926200  |
| C        | -0.48293500 | -3.37497900 | 0.18244300  |
| C        | 0.08235300  | -4.68386200 | 0.32339700  |
| C        | -0.70037200 | -5.79737800 | 0.33910000  |
| C        | -2.50654100 | -1.99336400 | -0.05062900 |
| C        | 0.32007100  | -2.22099400 | 0.16617400  |
| C        | -0.27750300 | -0.95378700 | 0.04399900  |
| C        | -1.70399500 | -0.84224500 | -0.06313000 |
| C        | -2.26486200 | 0.46980500  | -0.18324400 |
| H        | -3.34194500 | 0.56870600  | -0.24965500 |
| C        | -1.48245300 | 1.58028900  | -0.20333800 |
| C        | -0.05747800 | 1.48517200  | -0.11063000 |
| C        | 0.50441600  | 0.24261400  | 0.00392700  |
| H        | -2.72634800 | -6.57928500 | 0.22927800  |
| H        | -3.76993100 | -4.37484900 | -0.00007600 |
| H        | 1.15752900  | -4.77548400 | 0.42067000  |

|   |              |             |             |
|---|--------------|-------------|-------------|
| H | -0.24835100  | -6.77828500 | 0.44812000  |
| H | 1.58260600   | 0.14636700  | 0.04188500  |
| C | -8.27626100  | -1.50458900 | -0.49201700 |
| C | -8.98641600  | -2.25501400 | -1.45073300 |
| C | -8.98231500  | -0.64283700 | 0.34563400  |
| C | -10.36113700 | -2.16536800 | -1.59190100 |
| H | -8.44113400  | -2.94583800 | -2.08586000 |
| C | -10.36513900 | -0.53367800 | 0.22521600  |
| H | -8.45172300  | -0.04160900 | 1.07789600  |
| C | -11.04944600 | -1.29309300 | -0.74864200 |
| H | -10.87713200 | -2.76868100 | -2.33110000 |
| C | -11.36957600 | 0.24790000  | 0.91518000  |
| C | -12.60869300 | -0.08348600 | 0.32385600  |
| C | -11.32596800 | 1.17452900  | 1.95694500  |
| C | -13.80172800 | 0.48999700  | 0.76484600  |
| C | -12.50833800 | 1.75107500  | 2.39571000  |
| H | -10.37910500 | 1.43924100  | 2.41849900  |
| C | -13.73154000 | 1.40812700  | 1.80243800  |
| H | -14.75570200 | 0.22941200  | 0.31892700  |
| H | -12.48980100 | 2.47257400  | 3.20609300  |
| H | -14.64623100 | 1.86840600  | 2.16324700  |
| C | 6.09232500   | -2.67327200 | 0.61829000  |
| C | 6.81808700   | -1.77496300 | 1.42637800  |
| C | 6.78407200   | -3.66878200 | -0.06976400 |
| C | 8.19428500   | -1.84709100 | 1.56305600  |
| H | 6.28412900   | -0.98250700 | 1.94095300  |
| C | 8.16808200   | -3.76315900 | 0.04909000  |
| H | 6.24187900   | -4.38309800 | -0.68216200 |
| C | 8.86810900   | -2.85336500 | 0.87095500  |
| H | 8.72265500   | -1.12980200 | 2.18185600  |
| C | 9.16062700   | -4.65476800 | -0.51260400 |
| C | 10.40899700  | -4.23396900 | -0.00328700 |
| C | 9.09969900   | -5.74309900 | -1.38298200 |
| C | 11.59419300  | -4.87877400 | -0.35874100 |
| C | 10.27424300  | -6.39039900 | -1.73561200 |
| H | 8.14547000   | -6.07729500 | -1.77976200 |
| C | 11.50682000  | -5.95778500 | -1.22626400 |
| H | 12.55537100  | -4.55122200 | 0.02295700  |
| H | 10.24219000  | -7.23774900 | -2.41281300 |
| H | 12.41521300  | -6.47596800 | -1.51783600 |
| N | 10.21782200  | -3.15440400 | 0.84432200  |
| N | -12.40078100 | -1.00414600 | -0.69070200 |
| C | 11.26756700  | -2.40144800 | 1.50575600  |
| C | 11.82650200  | -1.27088600 | 0.64764100  |
| H | 12.05938500  | -3.10255600 | 1.78294400  |
| H | 10.85952800  | -2.00971500 | 2.44128000  |
| H | 12.61077900  | -0.73562400 | 1.19095000  |
| H | 12.25620800  | -1.66143500 | -0.27920400 |

|   |              |             |             |
|---|--------------|-------------|-------------|
| H | 11.04097600  | -0.55641400 | 0.38555100  |
| C | -13.43808600 | -1.63527100 | -1.48580200 |
| C | -14.01091500 | -2.89110700 | -0.83653700 |
| H | -13.01316100 | -1.86757500 | -2.46576600 |
| H | -14.22560700 | -0.89636500 | -1.65738500 |
| H | -14.78776300 | -3.32508000 | -1.47282600 |
| H | -13.23025700 | -3.64225200 | -0.68614900 |
| H | -14.45369100 | -2.65912100 | 0.13627200  |
| H | -1.94419300  | 2.55999200  | -0.27069100 |
| C | 1.80430800   | -2.33887400 | 0.28263300  |
| C | 2.45120100   | -2.08923500 | 1.49471900  |
| C | 2.58520000   | -2.69836200 | -0.81761700 |
| C | 3.83121100   | -2.19866700 | 1.60345900  |
| H | 1.86368900   | -1.81588800 | 2.36624000  |
| C | 3.96580200   | -2.80132200 | -0.71014700 |
| H | 2.10520300   | -2.88837800 | -1.77304300 |
| C | 4.61748900   | -2.55599600 | 0.50298400  |
| H | 4.30299900   | -2.02471900 | 2.56551900  |
| H | 4.54932000   | -3.05530800 | -1.58956200 |
| C | -3.99127300  | -1.87071000 | -0.16421800 |
| C | -4.78676000  | -1.71165200 | 0.97200500  |
| C | -4.62119100  | -1.91018600 | -1.40942900 |
| C | -6.16672100  | -1.59806700 | 0.86642000  |
| H | -4.31892300  | -1.68650700 | 1.95173800  |
| C | -6.00079500  | -1.79156100 | -1.51489100 |
| H | -4.02150800  | -2.02542200 | -2.30746000 |
| C | -6.80212400  | -1.63355400 | -0.37927500 |
| H | -6.76239000  | -1.50031100 | 1.76866500  |
| H | -6.46065700  | -1.80068900 | -2.49817300 |
| C | 0.77694400   | 2.70845100  | -0.14300000 |
| C | 0.41678900   | 3.81434600  | -0.92037000 |
| C | 1.95945000   | 2.80074400  | 0.59950300  |
| C | 1.20627800   | 4.95287100  | -0.97030600 |
| H | -0.48035700  | 3.77492000  | -1.53021300 |
| C | 2.74657300   | 3.94065300  | 0.56977200  |
| H | 2.25381400   | 1.97626800  | 1.24127200  |
| C | 2.38417900   | 5.03550100  | -0.22173000 |
| H | 0.91319700   | 5.78500900  | -1.60077200 |
| H | 3.64677900   | 3.99059200  | 1.17232000  |
| N | 3.18702700   | 6.19741600  | -0.26111600 |
| C | 2.58273300   | 7.47971100  | -0.32092700 |
| C | 4.60118500   | 6.08899800  | -0.24948700 |
| C | 1.48558400   | 7.78569300  | 0.48898300  |
| C | 3.08039800   | 8.45572500  | -1.18845800 |
| C | 5.36945800   | 6.95421400  | 0.53440600  |
| C | 5.24615000   | 5.12020400  | -1.02351800 |
| C | 0.89405500   | 9.04070600  | 0.42188800  |
| H | 1.09937200   | 7.03479000  | 1.16988600  |

|   |            |             |             |
|---|------------|-------------|-------------|
| C | 2.49518500 | 9.71462500  | -1.23612600 |
| H | 3.92825300 | 8.22241400  | -1.82355000 |
| C | 6.75498000 | 6.85504200  | 0.53510200  |
| H | 4.87471300 | 7.70454200  | 1.14171200  |
| C | 6.63105000 | 5.01509200  | -1.00267300 |
| H | 4.65666600 | 4.45034000  | -1.64016900 |
| C | 1.39670100 | 10.01396700 | -0.43630500 |
| H | 0.04171600 | 9.26187800  | 1.05703800  |
| H | 2.89483300 | 10.46194100 | -1.91481900 |
| C | 7.39448500 | 5.88320200  | -0.22821200 |
| H | 7.33676300 | 7.53599700  | 1.14885100  |
| H | 7.11587500 | 4.25606800  | -1.60900000 |
| H | 0.93703700 | 10.99596200 | -0.48099900 |
| H | 8.47669400 | 5.80343600  | -0.22003100 |

2

|   |              |             |             |
|---|--------------|-------------|-------------|
| C | -2.43041800  | -2.84661800 | 0.07034200  |
| C | -2.42628600  | -1.48070500 | -0.01486200 |
| C | -1.21925800  | -0.71561400 | -0.02047400 |
| C | 0.03304100   | -1.40916600 | 0.07823900  |
| C | -0.00135100  | -2.83775400 | 0.16967000  |
| C | -1.17380000  | -3.52452200 | 0.16403900  |
| C | -1.23842000  | 0.68851600  | -0.10197500 |
| C | 1.24051100   | -0.69315800 | 0.09177500  |
| C | 1.22136000   | 0.71103900  | 0.01062200  |
| C | -0.03098900  | 1.40455600  | -0.08775600 |
| C | 0.00327000   | 2.83322400  | -0.17735700 |
| H | -0.93492600  | 3.37123800  | -0.24398500 |
| C | 1.17556400   | 3.52019400  | -0.16933900 |
| C | 2.43241000   | 2.84249900  | -0.07642200 |
| C | 2.42831700   | 1.47619200  | 0.00569300  |
| H | -3.36705400  | -0.94509000 | -0.05459500 |
| H | 0.93682400   | -3.37577000 | 0.23663000  |
| H | -1.15963500  | -4.60852300 | 0.21192700  |
| H | 3.36908800   | 0.94050700  | 0.04319500  |
| C | -6.29704300  | 3.50767300  | -0.53508500 |
| C | -7.28670000  | 3.06119500  | -1.43398100 |
| C | -6.55502800  | 4.63387600  | 0.24464000  |
| C | -8.50587200  | 3.70305900  | -1.57246900 |
| H | -7.09789800  | 2.16881200  | -2.02209100 |
| C | -7.77314200  | 5.29769900  | 0.12594300  |
| H | -5.79817600  | 5.00574300  | 0.92882600  |
| C | -8.74301900  | 4.83197700  | -0.78825800 |
| H | -9.25053100  | 3.32338100  | -2.26369200 |
| C | -8.34113300  | 6.46540000  | 0.76586700  |
| C | -9.62587700  | 6.64201200  | 0.20628900  |
| C | -7.88313100  | 7.35170900  | 1.74071200  |
| C | -10.45937700 | 7.68437300  | 0.61307000  |
| C | -8.70579000  | 8.39221200  | 2.14511200  |
| H | -6.89661100  | 7.22690500  | 2.17760100  |
| C | -9.98067500  | 8.55206600  | 1.58388100  |

|   |              |             |             |
|---|--------------|-------------|-------------|
| H | -11.45032800 | 7.81611800  | 0.19176200  |
| H | -8.36330800  | 9.08881100  | 2.90345400  |
| H | -10.61049200 | 9.37124100  | 1.91704100  |
| C | 6.29955700   | -3.51177800 | 0.52366500  |
| C | 7.28962700   | -3.06471800 | 1.42182300  |
| C | 6.55726100   | -4.63840800 | -0.25554500 |
| C | 8.50888300   | -3.70646200 | 1.56014900  |
| H | 7.10108000   | -2.17200100 | 2.00950300  |
| C | 7.77547700   | -5.30208300 | -0.13704400 |
| H | 5.80010600   | -5.01076400 | -0.93912900 |
| C | 8.74572200   | -4.83583200 | 0.77649700  |
| H | 9.25380600   | -3.32636400 | 2.25085900  |
| C | 8.34323300   | -6.47012400 | -0.77656500 |
| C | 9.62819900   | -6.64642300 | -0.21740200 |
| C | 7.88484600   | -7.35697200 | -1.75074100 |
| C | 10.46153700  | -7.68901400 | -0.62392400 |
| C | 8.70735100   | -8.39769500 | -2.15489100 |
| H | 6.89814200   | -7.23243300 | -2.18729000 |
| C | 9.98245100   | -8.55724400 | -1.59406800 |
| H | 11.45263800  | -7.82055200 | -0.20290300 |
| H | 8.36456100   | -9.09472600 | -2.91269700 |
| H | 10.61212400  | -9.37662100 | -1.92700200 |
| N | 9.85431300   | -5.66170000 | 0.73090700  |
| N | -9.85160900  | 5.65783800  | -0.74267200 |
| C | 11.08485000  | -5.47134000 | 1.47666800  |
| C | 12.10369200  | -4.60476500 | 0.74310600  |
| H | 11.50254400  | -6.45860800 | 1.69205900  |
| H | 10.82565800  | -5.02779800 | 2.44158400  |
| H | 13.00990400  | -4.49449400 | 1.34589200  |
| H | 12.38079500  | -5.05521700 | -0.21424100 |
| H | 11.69784800  | -3.60820800 | 0.54718600  |
| C | -11.08202000 | 5.46764300  | -1.48870000 |
| C | -12.10088100 | 4.60069100  | -0.75561600 |
| H | -10.82262400 | 5.02449700  | -2.45374400 |
| H | -11.49976000 | 6.45496100  | -1.70378700 |
| H | -13.00698600 | 4.49053700  | -1.35858400 |
| H | -11.69498100 | 3.60411000  | -0.55996300 |
| H | -12.37818500 | 5.05076400  | 0.20184900  |
| H | 1.16106400   | 4.60428500  | -0.21428500 |
| C | 2.54123300   | -1.41936800 | 0.20088800  |
| C | 3.17808500   | -1.56497400 | 1.43493900  |
| C | 3.15526600   | -1.96951200 | -0.92578000 |
| C | 4.38669600   | -2.24055700 | 1.53902800  |
| H | 2.71461500   | -1.15247800 | 2.32626000  |
| C | 4.36729400   | -2.63949200 | -0.82214600 |
| H | 2.68270800   | -1.86100900 | -1.89751900 |
| C | 5.00726000   | -2.79073000 | 0.41242600  |
| H | 4.84489700   | -2.36076300 | 2.51574800  |
| H | 4.83492700   | -3.03303700 | -1.71926100 |
| C | -2.53910700  | 1.41476500  | -0.21135900 |
| C | -3.15401700  | 1.96383800  | 0.91535600  |
| C | -3.17496600  | 1.56155100  | -1.44577300 |
| C | -4.36591100  | 2.63399700  | 0.81139700  |
| H | -2.68223500  | 1.85437500  | 1.88736500  |
| C | -4.38349200  | 2.23725700  | -1.55017000 |
| H | -2.71079400  | 1.14989700  | -2.33711800 |



|   |             |             |             |
|---|-------------|-------------|-------------|
| C | -5.00488700 | 2.78642800  | -0.42354600 |
| H | -4.83426300 | 3.02672000  | 1.70849600  |
| H | -4.84095900 | 2.35837600  | -2.52712500 |
| C | 3.69822900  | 3.61149300  | -0.07742000 |
| C | 4.80685900  | 3.18843800  | 0.66439600  |
| C | 3.83402600  | 4.78570400  | -0.82569400 |
| C | 5.99518000  | 3.90109100  | 0.66119800  |
| H | 4.72856800  | 2.30085600  | 1.28436100  |
| C | 5.02399500  | 5.49656400  | -0.84884600 |
| H | 3.00628100  | 5.13538600  | -1.43463300 |
| C | 6.12431000  | 5.06644300  | -0.10138500 |
| H | 6.83065100  | 3.55986200  | 1.26245200  |
| H | 5.10660100  | 6.39048200  | -1.45712000 |
| N | 7.33629000  | 5.79300100  | -0.11318300 |
| C | 8.57856400  | 5.10879700  | -0.11894900 |
| C | 7.31559300  | 7.21146700  | -0.13115700 |
| C | 8.76456400  | 3.97998800  | -0.92204900 |
| C | 9.63646200  | 5.55815600  | 0.67635200  |
| C | 8.17713600  | 7.92106100  | -0.97202800 |
| C | 6.43625400  | 7.91827800  | 0.69373000  |
| C | 9.98203800  | 3.31128900  | -0.91936600 |
| H | 7.95053800  | 3.62964200  | -1.54742900 |
| C | 10.85694400 | 4.89517700  | 0.65884700  |
| H | 9.49691800  | 6.43010400  | 1.30623000  |
| C | 8.16267000  | 9.31009400  | -0.97880300 |
| H | 8.85794000  | 7.37808800  | -1.61877200 |
| C | 6.41463700  | 9.30690600  | 0.66751400  |
| H | 5.77010700  | 7.37349400  | 1.35411500  |
| C | 11.03688900 | 3.76603200  | -0.13407600 |
| H | 10.10897600 | 2.43548500  | -1.54838200 |
| H | 11.66869100 | 5.25872800  | 1.28155500  |
| C | 7.27947700  | 10.01170400 | -0.16411500 |
| H | 8.83933600  | 9.84600700  | -1.63739000 |
| H | 5.72452400  | 9.84056000  | 1.31386900  |
| H | 11.98931000 | 3.24597300  | -0.14016200 |
| H | 7.26540900  | 11.09670200 | -0.17692900 |
| C | -3.69701200 | -3.61556600 | 0.07544700  |
| C | -3.83564200 | -4.77936400 | 0.83920000  |
| C | -4.80247000 | -3.20199500 | -0.67574700 |
| C | -5.02080800 | -5.49849700 | 0.85482700  |
| H | -3.00500300 | -5.12924700 | 1.44405400  |
| C | -5.99710300 | -3.90447000 | -0.65316400 |
| H | -4.72667500 | -2.31442300 | -1.29589800 |
| C | -6.12400800 | -5.06794800 | 0.11188800  |
| H | -5.09734200 | -6.39923500 | 1.45381200  |
| H | -6.83926500 | -3.55518200 | -1.24023800 |
| N | -7.33789700 | -5.79279500 | 0.13302500  |
| C | -7.80500500 | -6.36188900 | 1.34540700  |
| C | -8.09682300 | -5.94714800 | -1.05500500 |
| C | -7.73480900 | -5.64115400 | 2.54094900  |
| C | -8.34490400 | -7.65092700 | 1.36014800  |
| C | -9.48746200 | -5.80928400 | -1.02937600 |
| C | -7.46601100 | -6.24271500 | -2.26684600 |
| C | -8.18635700 | -6.20584600 | 3.72691900  |
| H | -7.32434200 | -4.63716200 | 2.53556300  |
| C | -8.81214400 | -8.20117000 | 2.54693300  |

|   |              |             |             |
|---|--------------|-------------|-------------|
| H | -8.39682100  | -8.21791000 | 0.43692600  |
| C | -10.22943700 | -5.97335700 | -2.19214100 |
| H | -9.98274600  | -5.57424100 | -0.09348800 |
| C | -8.21328700  | -6.38634700 | -3.42887000 |
| H | -6.38786000  | -6.35860400 | -2.29272600 |
| C | -8.73167400  | -7.48593600 | 3.73776500  |
| H | -8.12315800  | -5.63261900 | 4.64682700  |
| H | -9.22964000  | -9.20341900 | 2.54048300  |
| C | -9.59851500  | -6.25766000 | -3.39926800 |
| H | -11.30901400 | -5.86422500 | -2.15402000 |
| H | -7.70713400  | -6.61479200 | -4.36186200 |
| H | -9.09045500  | -7.92156700 | 4.66464500  |
| H | -10.18020600 | -6.37812900 | -4.30740500 |

3

|   |             |             |             |
|---|-------------|-------------|-------------|
| C | 0.02204800  | -2.99511300 | -3.36547500 |
| C | 0.79581900  | -2.64911600 | -2.30012400 |
| C | 0.21991600  | -2.13913700 | -1.09099400 |
| C | -1.20620100 | -1.97862000 | -1.03436400 |
| C | -1.98039800 | -2.36324000 | -2.17680900 |
| C | -1.39172700 | -2.85576600 | -3.30063800 |
| C | 1.01412700  | -1.77118000 | 0.00902600  |
| C | -1.80936000 | -1.44808700 | 0.11819500  |
| C | -1.01866700 | -1.10440500 | 1.22765600  |
| C | 0.40551300  | -1.27867600 | 1.17696000  |
| C | 1.17092900  | -0.93834300 | 2.33861300  |
| H | 2.24372000  | -1.08745700 | 2.31361900  |
| C | 0.57876600  | -0.44582700 | 3.46072300  |
| C | -0.82947300 | -0.25208500 | 3.50249900  |
| C | -1.59721400 | -0.57128500 | 2.42507800  |
| H | 0.48268400  | -3.38004600 | -4.26988900 |
| H | 1.87245600  | -2.75866100 | -2.35467900 |
| H | -3.05747900 | -2.25380200 | -2.13134400 |
| H | -1.99924600 | -3.14107600 | -4.15373500 |
| H | -1.29011900 | 0.14809300  | 4.40028300  |
| H | -2.67067000 | -0.42842600 | 2.46127000  |
| C | 6.78611000  | -2.42516600 | -0.05863700 |
| C | 7.37071600  | -3.55260400 | -0.66994800 |
| C | 7.61554400  | -1.47837200 | 0.54015300  |
| C | 8.74041500  | -3.75477300 | -0.69549000 |
| H | 6.72777700  | -4.27702600 | -1.15957100 |
| C | 8.99630100  | -1.65644600 | 0.52771600  |
| H | 7.18403400  | -0.61259400 | 1.03355200  |
| C | 9.55375800  | -2.79898500 | -0.08664600 |
| H | 9.15697900  | -4.62699400 | -1.18769600 |
| C | 10.10765000 | -0.88671500 | 1.04551200  |
| C | 11.27852500 | -1.60332700 | 0.71333500  |
| C | 10.20769500 | 0.31789100  | 1.74171400  |
| C | 12.54429000 | -1.12872800 | 1.05857900  |
| C | 11.46314100 | 0.79142900  | 2.09166300  |
| H | 9.31455200  | 0.87732400  | 2.00426700  |
| C | 12.61689100 | 0.07157600  | 1.75029600  |
| H | 13.44551700 | -1.67202900 | 0.79523700  |
| H | 11.55643600 | 1.72764900  | 2.63240300  |
| H | 13.59057000 | 0.46177200  | 2.03029300  |

|   |              |             |             |
|---|--------------|-------------|-------------|
| C | -7.55280100  | -0.60455600 | 0.27280300  |
| C | -8.07951300  | 0.67958700  | 0.51813600  |
| C | -8.43356300  | -1.66525100 | 0.06749300  |
| C | -9.44160400  | 0.92606200  | 0.56030500  |
| H | -7.39501900  | 1.50088900  | 0.70480900  |
| C | -9.80784200  | -1.44525600 | 0.10496000  |
| H | -8.04803400  | -2.65855900 | -0.14223200 |
| C | -10.30691200 | -0.14682000 | 0.34631500  |
| H | -9.81266500  | 1.92426600  | 0.76643200  |
| C | -10.96196900 | -2.30211800 | -0.06637400 |
| C | -12.09801900 | -1.47649600 | 0.08417600  |
| C | -11.12491700 | -3.66285100 | -0.32622700 |
| C | -13.39045400 | -1.99326200 | -0.01197600 |
| C | -12.40735100 | -4.18052400 | -0.42749800 |
| H | -10.25895100 | -4.30735200 | -0.44613000 |
| C | -13.52564800 | -3.34951800 | -0.27037500 |
| H | -14.26455200 | -1.36313100 | 0.11321800  |
| H | -12.54946300 | -5.23748700 | -0.62811800 |
| H | -14.52114900 | -3.77538100 | -0.34987900 |
| N | -11.68945400 | -0.17307800 | 0.31788300  |
| N | 10.93020100  | -2.76507400 | 0.04294500  |
| C | -12.56418200 | 0.95344700  | 0.58666200  |
| C | -12.90876300 | 1.10682300  | 2.06474200  |
| H | -13.47159800 | 0.82253800  | -0.00898200 |
| H | -12.07393000 | 1.85496900  | 0.20965200  |
| H | -13.56853700 | 1.96692100  | 2.21189600  |
| H | -13.41825100 | 0.21492900  | 2.44045000  |
| H | -12.00521600 | 1.26098000  | 2.66147100  |
| C | 11.85843300  | -3.73140600 | -0.51489900 |
| C | 12.30087600  | -3.38879400 | -1.93399600 |
| H | 11.37654200  | -4.71230500 | -0.48760800 |
| H | 12.72141700  | -3.79202400 | 0.15372100  |
| H | 12.99707400  | -4.14608200 | -2.30622100 |
| H | 11.44252600  | -3.34885200 | -2.61063500 |
| H | 12.80302600  | -2.41756900 | -1.96162700 |
| H | 1.18043200   | -0.19892800 | 4.32985200  |
| C | -3.28752600  | -1.23628600 | 0.15931500  |
| C | -3.85378200  | -0.06935300 | -0.35825900 |
| C | -4.13972400  | -2.19156000 | 0.71556100  |
| C | -5.22700800  | 0.13392600  | -0.32213500 |
| H | -3.21019900  | 0.68481800  | -0.80214600 |
| C | -5.51266100  | -1.98542000 | 0.75592200  |
| H | -3.72077600  | -3.10316900 | 1.13130100  |
| C | -6.08494900  | -0.81979800 | 0.23626100  |
| H | -5.64101800  | 1.03949800  | -0.75476700 |
| H | -6.14887500  | -2.73440400 | 1.21705900  |
| C | 2.50246600   | -1.90721000 | -0.05473000 |
| C | 3.35175200   | -0.79416500 | -0.20559900 |
| C | 3.07908200   | -3.17104100 | 0.08437700  |
| C | 4.73403100   | -0.99066800 | -0.20101400 |
| C | 4.45477500   | -3.34823900 | 0.08419300  |
| H | 2.42931600   | -4.03113500 | 0.21627300  |
| C | 5.31212200   | -2.25383600 | -0.05688100 |
| H | 5.37665500   | -0.12861400 | -0.35069000 |
| H | 4.86518900   | -4.34346100 | 0.22190500  |
| C | 2.82082300   | 0.58831800  | -0.35147200 |

|   |             |            |             |
|---|-------------|------------|-------------|
| C | 3.24882900  | 1.60376800 | 0.50711700  |
| C | 1.88577900  | 0.91803500 | -1.33679000 |
| C | 2.73203300  | 2.88908400 | 0.42024100  |
| H | 3.97143600  | 1.37473800 | 1.28477000  |
| C | 1.37978700  | 2.20343900 | -1.44426800 |
| H | 1.55870700  | 0.16198500 | -2.04206500 |
| C | 1.77931500  | 3.20195200 | -0.55153300 |
| H | 3.05480800  | 3.65187700 | 1.12036100  |
| H | 0.66044100  | 2.43912400 | -2.22099300 |
| N | 1.21461500  | 4.49848100 | -0.62947800 |
| C | 2.03328500  | 5.64074800 | -0.44934200 |
| C | -0.18266300 | 4.64317000 | -0.81991300 |
| C | 3.29721500  | 5.70341000 | -1.04374200 |
| C | 1.59422000  | 6.71887800 | 0.32472700  |
| C | -0.68361600 | 5.64490000 | -1.65652300 |
| C | -1.08095400 | 3.78492800 | -0.17763900 |
| C | 4.10536700  | 6.81755600 | -0.85791900 |
| H | 3.64180800  | 4.87369900 | -1.65152700 |
| C | 2.40092600  | 7.83759200 | 0.48990100  |
| H | 0.61820900  | 6.67576600 | 0.79565000  |
| C | -2.05340200 | 5.78779400 | -1.83777300 |
| H | 0.00633300  | 6.31059600 | -2.16379400 |
| C | -2.44850800 | 3.92291200 | -0.37929900 |
| H | -0.70386100 | 3.00757200 | 0.47790400  |
| C | 3.66211900  | 7.89359200 | -0.09501100 |
| H | 5.08443600  | 6.84823600 | -1.32631100 |
| H | 2.04319000  | 8.66616000 | 1.09360400  |
| C | -2.94481200 | 4.92620300 | -1.20610200 |
| H | -2.42390400 | 6.57209100 | -2.49086700 |
| H | -3.13017400 | 3.24640200 | 0.12791500  |
| H | 4.29262300  | 8.76608800 | 0.04210200  |
| H | -4.01395300 | 5.03569100 | -1.35626000 |

4

|   |             |             |             |
|---|-------------|-------------|-------------|
| C | 0.65912100  | 0.89051800  | -3.62692400 |
| C | 1.29871000  | 0.48445700  | -2.49636500 |
| C | 0.59887700  | 0.32261600  | -1.25723100 |
| C | -0.81020200 | 0.59904400  | -1.22989600 |
| C | -1.44286400 | 1.01329900  | -2.44734100 |
| C | -0.73711900 | 1.15760800  | -3.60239000 |
| C | 1.25235100  | -0.11991600 | -0.09423700 |
| C | -1.54050900 | 0.42335500  | -0.04118000 |
| C | -0.88068100 | 0.00957400  | 1.12901800  |
| C | 0.52581700  | -0.27623700 | 1.09880800  |
| C | 1.15888300  | -0.69894500 | 2.31314400  |
| H | 2.22079800  | -0.91434000 | 2.29546500  |
| C | 0.45812900  | -0.82552500 | 3.47335200  |
| C | -0.93358700 | -0.53592000 | 3.50420900  |
| C | -1.57519500 | -0.13397200 | 2.37325000  |
| H | 1.21186300  | 1.00472000  | -4.55411200 |
| H | 2.36023900  | 0.26970100  | -2.52287100 |
| H | -2.50780500 | 1.21227500  | -2.43603100 |
| H | -1.23996700 | 1.47292700  | -4.51126600 |
| H | -1.48166500 | -0.63213800 | 4.43617600  |
| H | -2.63377500 | 0.09450900  | 2.40422100  |

|   |              |             |             |
|---|--------------|-------------|-------------|
| C | 6.81047800   | -1.77381800 | -0.42885300 |
| C | 7.16609500   | -2.87049500 | -1.23967500 |
| C | 7.80919600   | -1.10840900 | 0.28008300  |
| C | 8.47342000   | -3.31206700 | -1.35643100 |
| H | 6.39272800   | -3.37266000 | -1.81210800 |
| C | 9.13182400   | -1.53167400 | 0.18052100  |
| H | 7.55298700   | -0.27395400 | 0.92598100  |
| C | 9.45808900   | -2.63735400 | -0.63459100 |
| H | 8.71434100   | -4.15013400 | -2.00159300 |
| C | 10.37332300  | -1.07718600 | 0.77020700  |
| C | 11.38512600  | -1.93063400 | 0.27750100  |
| C | 10.70487700  | -0.04584400 | 1.64898300  |
| C | 12.72088300  | -1.76152000 | 0.64337300  |
| C | 12.03032300  | 0.12338100  | 2.01958100  |
| H | 9.93539500   | 0.61599400  | 2.03564300  |
| C | 13.02460500  | -0.72857300 | 1.51816000  |
| H | 13.50150300  | -2.40927300 | 0.25891300  |
| H | 12.30332300  | 0.92213600  | 2.70153900  |
| H | 14.05698200  | -0.57680900 | 1.81795900  |
| C | -7.22841700  | 1.58742100  | 0.16970100  |
| C | -7.69399200  | 2.68945800  | 0.91496700  |
| C | -8.15295400  | 0.79219600  | -0.50539400 |
| C | -9.03819900  | 3.01107000  | 1.00032400  |
| H | -6.97741800  | 3.29432900  | 1.46139100  |
| C | -9.51055200  | 1.09299100  | -0.43590700 |
| H | -7.81286400  | -0.04911800 | -1.10180900 |
| C | -9.94788800  | 2.20635100  | 0.31423400  |
| H | -9.36284700  | 3.85808200  | 1.59505100  |
| C | -10.69769200 | 0.49046500  | -1.00447500 |
| C | -11.79042300 | 1.26956200  | -0.56441500 |
| C | -10.92200800 | -0.61446000 | -1.82580500 |
| C | -13.10075300 | 0.95424600  | -0.92532600 |
| C | -12.22202600 | -0.92914000 | -2.19160800 |
| H | -10.08975200 | -1.22013900 | -2.17244400 |
| C | -13.29729400 | -0.14952800 | -1.74235100 |
| H | -13.94236900 | 1.54527200  | -0.58005100 |
| H | -12.41164500 | -1.78656100 | -2.82918300 |
| H | -14.30783100 | -0.41513400 | -2.03726600 |
| N | -11.32352100 | 2.31269500  | 0.21937800  |
| N | 10.81767000  | -2.87909500 | -0.55852000 |
| C | -12.14819400 | 3.29020000  | 0.90552300  |
| C | -12.59605200 | 2.83168000  | 2.28985000  |
| H | -13.01309500 | 3.50278100  | 0.27137900  |
| H | -11.57807700 | 4.22049100  | 0.97355100  |
| H | -13.21407600 | 3.60127800  | 2.76153700  |
| H | -13.18381000 | 1.91163600  | 2.22431200  |
| H | -11.73354400 | 2.64074400  | 2.93470400  |
| C | 11.54166800  | -3.89090000 | -1.30590500 |
| C | 12.02167600  | -3.40128800 | -2.66857600 |
| H | 10.88545000  | -4.75821400 | -1.41710200 |
| H | 12.38671800  | -4.21866600 | -0.69448300 |
| H | 12.56046500  | -4.19865600 | -3.18879800 |
| H | 11.17688900  | -3.09409100 | -3.29161800 |
| H | 12.69471500  | -2.54607100 | -2.55999600 |
| H | 0.96124900   | -1.14313400 | 4.38125900  |
| C | -3.01376400  | 0.68139600  | -0.01771300 |

|   |             |             |             |
|---|-------------|-------------|-------------|
| C | -3.47127900 | 2.00058800  | -0.00544400 |
| C | -3.96178800 | -0.35905400 | 0.03117700  |
| C | -4.82352400 | 2.30315000  | 0.05242800  |
| H | -2.74431000 | 2.80647400  | -0.04246800 |
| C | -5.31841400 | -0.03517200 | 0.10177000  |
| C | -5.77718100 | 1.28345700  | 0.10966500  |
| H | -5.14028900 | 3.34107600  | 0.03573800  |
| H | -6.03865700 | -0.84563100 | 0.15616600  |
| C | 2.70154500  | -0.48803200 | -0.14319000 |
| C | 3.74054700  | 0.46023400  | -0.15526500 |
| C | 3.03359600  | -1.84278700 | -0.22626100 |
| C | 5.06082800  | 0.01349700  | -0.25832000 |
| C | 4.34995300  | -2.26773100 | -0.31716100 |
| H | 2.23397200  | -2.57795400 | -0.22256300 |
| C | 5.39453800  | -1.33942300 | -0.33617400 |
| H | 5.85358300  | 0.75472600  | -0.28234100 |
| H | 4.56734800  | -3.33047100 | -0.35727800 |
| C | 3.49265800  | 1.92685600  | -0.09495000 |
| C | 2.72494700  | 2.50889900  | 0.91741900  |
| C | 4.06283800  | 2.77615200  | -1.04737300 |
| C | 2.52053600  | 3.87961200  | 0.96785000  |
| H | 2.27798500  | 1.88262200  | 1.68170700  |
| C | 3.87560800  | 4.14974600  | -0.99712100 |
| H | 4.66612600  | 2.35380300  | -1.84543200 |
| C | 3.09373400  | 4.72119300  | 0.00999700  |
| H | 1.91387200  | 4.30512400  | 1.75970700  |
| H | 4.33312400  | 4.78583200  | -1.74694200 |
| N | 2.88744100  | 6.12050500  | 0.05872900  |
| C | 2.88619700  | 6.79502200  | 1.30593000  |
| C | 2.65930700  | 6.84710400  | -1.13709700 |
| C | 3.84283700  | 6.48895600  | 2.27804000  |
| C | 1.92924900  | 7.77605900  | 1.58068300  |
| C | 3.25794600  | 8.09525800  | -1.33189800 |
| C | 1.83155300  | 6.32821200  | -2.13704600 |
| C | 3.83297100  | 7.14532500  | 3.50213400  |
| H | 4.59238500  | 5.73340100  | 2.06877200  |
| C | 1.93773800  | 8.44135300  | 2.80001800  |
| H | 1.17999700  | 8.01407100  | 0.83344000  |
| C | 3.02360400  | 8.81054900  | -2.49926400 |
| H | 3.90647900  | 8.50149100  | -0.56323200 |
| C | 1.61761300  | 7.04139300  | -3.30962500 |
| H | 1.35834700  | 5.36322900  | -1.99120000 |
| C | 2.88493400  | 8.12810000  | 3.76988500  |
| H | 4.58249400  | 6.89413900  | 4.24643900  |
| H | 1.18762300  | 9.20137100  | 2.99647900  |
| C | 2.20701700  | 8.28780700  | -3.49726700 |
| H | 3.49581900  | 9.77904500  | -2.63327500 |
| H | 0.97267900  | 6.62261400  | -4.07614900 |
| H | 2.88440200  | 8.64438200  | 4.72438300  |
| H | 2.03193600  | 8.84580300  | -4.41138100 |
| C | -3.56516400 | -1.79324100 | 0.05173000  |
| C | -2.70306500 | -2.33472800 | -0.90629300 |
| C | -4.05593600 | -2.64662600 | 1.04365900  |
| C | -2.32657500 | -3.66767900 | -0.86067700 |
| H | -2.33231300 | -1.70972300 | -1.71097200 |
| C | -3.67067300 | -3.97849900 | 1.10681300  |

|   |             |             |             |
|---|-------------|-------------|-------------|
| H | -4.72221900 | -2.25193600 | 1.80493300  |
| C | -2.78961000 | -4.50282800 | 0.15931700  |
| H | -1.66184100 | -4.06936400 | -1.61799000 |
| H | -4.04023400 | -4.61326600 | 1.90493900  |
| N | -2.35619600 | -5.85022900 | 0.23096100  |
| C | -0.97861200 | -6.14483200 | 0.07075100  |
| C | -3.28257400 | -6.88026500 | 0.52145300  |
| C | -0.00620100 | -5.32068400 | 0.64590100  |
| C | -0.57202900 | -7.25982200 | -0.66786400 |
| C | -2.93748200 | -7.93345100 | 1.37433000  |
| C | -4.56272100 | -6.85733300 | -0.04130800 |
| C | 1.34302200  | -5.60539800 | 0.47630000  |
| H | -0.31194000 | -4.45657300 | 1.22578900  |
| C | 0.77881000  | -7.54678800 | -0.81827200 |
| H | -1.32042100 | -7.89986400 | -1.12264000 |
| C | -3.85123400 | -8.94349400 | 1.64677600  |
| H | -1.95022300 | -7.95672100 | 1.82241700  |
| C | -5.47626800 | -7.86149800 | 0.25147400  |
| H | -4.83713400 | -6.04830000 | -0.70950900 |
| C | 1.74499700  | -6.72072300 | -0.25246900 |
| H | 2.08426700  | -4.95659600 | 0.93383500  |
| H | 1.07633600  | -8.41733200 | -1.39492400 |
| C | -5.12700800 | -8.91359900 | 1.09246000  |
| H | -3.56460700 | -9.75353700 | 2.31061900  |
| H | -6.46567900 | -7.82581600 | -0.19438200 |
| H | 2.79955700  | -6.94428500 | -0.37711300 |
| H | -5.84063700 | -9.70067700 | 1.31333000  |

5

|   |             |             |             |
|---|-------------|-------------|-------------|
| C | -1.22014300 | -4.80084400 | 0.73618300  |
| C | -1.93200400 | -3.67356800 | 0.46194600  |
| C | -1.28310600 | -2.41671700 | 0.23841800  |
| C | 0.15000300  | -2.36587000 | 0.31386400  |
| C | 0.85606400  | -3.57662000 | 0.61126100  |
| C | 0.19852500  | -4.75114600 | 0.81297800  |
| C | -2.01539800 | -1.24812100 | -0.03728400 |
| C | 0.82488500  | -1.14654600 | 0.11973600  |
| C | 0.09020900  | 0.02507200  | -0.13596800 |
| C | -1.34182300 | -0.03124200 | -0.22643700 |
| C | -2.04572300 | 1.17701100  | -0.53884600 |
| H | -3.12454600 | 1.14035100  | -0.62858100 |
| C | -1.39352700 | 2.35192300  | -0.72732000 |
| C | 0.02867800  | 2.42166000  | -0.60780700 |
| C | 0.73759300  | 1.28605700  | -0.33353100 |
| H | -1.73446800 | -5.74188300 | 0.90402900  |
| H | -3.01346100 | -3.71322600 | 0.41289000  |
| H | 1.93639800  | -3.54270400 | 0.68075400  |
| H | 0.75594900  | -5.65440200 | 1.04017100  |
| H | 1.81803100  | 1.32160000  | -0.27649200 |
| C | -7.80802700 | -1.44122100 | -0.39642000 |
| C | -8.45111800 | -2.51492200 | -1.04455900 |
| C | -8.58590700 | -0.42462200 | 0.15529800  |
| C | -9.82928300 | -2.59525100 | -1.15469700 |
| H | -7.84784700 | -3.32029200 | -1.45121000 |
| C | -9.97365900 | -0.48056800 | 0.05869700  |

|   |              |             |             |
|---|--------------|-------------|-------------|
| H | -8.10873600  | 0.42097700  | 0.64158600  |
| C | -10.59037700 | -1.56536500 | -0.60178000 |
| H | -10.29214000 | -3.44348300 | -1.64752900 |
| C | -11.04225600 | 0.38786800  | 0.50550000  |
| C | -12.24890700 | -0.22057800 | 0.09488500  |
| C | -11.07834100 | 1.59692100  | 1.20026600  |
| C | -13.48736900 | 0.35637300  | 0.37755400  |
| C | -12.30652900 | 2.17733200  | 1.47884600  |
| H | -10.15710800 | 2.07588800  | 1.51903800  |
| C | -13.49632400 | 1.55843600  | 1.06998700  |
| H | -14.41570200 | -0.11445800 | 0.07215400  |
| H | -12.35013100 | 3.11733400  | 2.01931800  |
| H | -14.44766100 | 2.02754400  | 1.30150000  |
| C | 6.62744500   | -1.09094300 | 0.31533100  |
| C | 7.31910800   | -0.02159500 | 0.91875800  |
| C | 7.36033300   | -2.14312400 | -0.23131900 |
| C | 8.70138900   | 0.02112100  | 0.99040800  |
| H | 6.74923200   | 0.81055300  | 1.31955900  |
| C | 8.75126800   | -2.12539600 | -0.17365000 |
| H | 6.84602000   | -2.98573400 | -0.68375000 |
| C | 9.41707000   | -1.04378900 | 0.44309600  |
| H | 9.20179700   | 0.86721900  | 1.44906700  |
| C | 9.78171500   | -3.03489600 | -0.62823500 |
| C | 11.01627700  | -2.45274800 | -0.26537000 |
| C | 9.76370500   | -4.25997300 | -1.29509700 |
| C | 12.22932700  | -3.07216300 | -0.56771600 |
| C | 10.96645400  | -4.88245900 | -1.59298200 |
| H | 8.82055300   | -4.71838300 | -1.57789600 |
| C | 12.18446500  | -4.28954200 | -1.23141100 |
| H | 13.17907500  | -2.62192900 | -0.29933200 |
| H | 10.96796400  | -5.83529800 | -2.11231200 |
| H | 13.11512100  | -4.79146600 | -1.47765100 |
| N | 10.78263700  | -1.25709500 | 0.39517900  |
| N | -11.96249400 | -1.39274500 | -0.58652100 |
| C | 11.80152500  | -0.33799300 | 0.86784000  |
| C | 12.23561100  | 0.67258200  | -0.18919700 |
| H | 12.65505100  | -0.93056300 | 1.20794300  |
| H | 11.40809500  | 0.17281100  | 1.75072600  |
| H | 13.00298200  | 1.33835500  | 0.21654500  |
| H | 12.64909500  | 0.16597500  | -1.06587200 |
| H | 11.38865000  | 1.28297500  | -0.51529600 |
| C | -12.94067100 | -2.32905600 | -1.10890800 |
| C | -13.37582300 | -3.37508400 | -0.08739900 |
| H | -12.50729600 | -2.80857600 | -1.99064300 |
| H | -13.80077000 | -1.75317400 | -1.46103300 |
| H | -14.11048100 | -4.05369600 | -0.53066200 |
| H | -12.52114600 | -3.96765600 | 0.25123800  |
| H | -13.83033900 | -2.90044900 | 0.78688500  |
| H | -1.93702300  | 3.25688700  | -0.97271500 |
| C | 2.31648000   | -1.11031100 | 0.17063200  |
| C | 2.99395700   | -0.60294400 | 1.28041500  |
| C | 3.07405500   | -1.60189800 | -0.89534800 |
| C | 4.38202700   | -0.59777000 | 1.32669800  |
| H | 2.42886100   | -0.21290200 | 2.12165400  |
| C | 4.46112100   | -1.58949300 | -0.85114300 |
| H | 2.56826300   | -1.99207400 | -1.77350800 |



|   |             |             |             |
|---|-------------|-------------|-------------|
| C | 5.14446600  | -1.09204900 | 0.26373400  |
| H | 4.87909900  | -0.21978600 | 2.21417500  |
| H | 5.02324600  | -1.95426100 | -1.70512000 |
| C | -3.50513600 | -1.30078700 | -0.12905900 |
| C | -4.30512500 | -0.86536500 | 0.92928200  |
| C | -4.13723800 | -1.78587800 | -1.27569400 |
| C | -5.69009900 | -0.91580100 | 0.84449100  |
| H | -3.83570800 | -0.49182900 | 1.83453500  |
| C | -5.52238300 | -1.83075500 | -1.36220800 |
| H | -3.53563500 | -2.12184600 | -2.11504500 |
| C | -6.32765400 | -1.39722100 | -0.30375100 |
| H | -6.28645400 | -0.59491300 | 1.69288600  |
| H | -5.98532600 | -2.18744600 | -2.27697500 |
| C | 0.66731500  | 3.72407200  | -0.85846200 |
| N | 0.23512700  | 4.55210600  | -1.77733600 |
| N | 1.78128500  | 4.20064500  | -0.18627600 |
| C | 1.08834600  | 5.63716800  | -1.73210900 |
| C | 2.06400000  | 5.44300900  | -0.74195000 |
| C | 2.41006200  | 3.68614500  | 0.98643400  |
| C | 1.08431500  | 6.81045400  | -2.49112900 |
| C | 3.03680300  | 6.39886400  | -0.45661000 |
| C | 1.65989000  | 3.44590200  | 2.13511500  |
| C | 3.78656700  | 3.47919900  | 0.98691100  |
| C | 2.05455700  | 7.76077700  | -2.22334000 |
| H | 0.33473200  | 6.96275800  | -3.26066000 |
| C | 3.01500400  | 7.55797100  | -1.21633000 |
| H | 3.77616600  | 6.24700100  | 0.32164300  |
| C | 2.29209400  | 2.98465200  | 3.28307500  |
| H | 0.59055200  | 3.62553300  | 2.12599600  |
| C | 4.41461900  | 3.04025800  | 2.14746400  |
| H | 4.35744000  | 3.66074800  | 0.08259000  |
| H | 2.07592500  | 8.68223800  | -2.79645900 |
| H | 3.75736900  | 8.32719800  | -1.02875700 |
| C | 3.67020800  | 2.78761100  | 3.29458100  |
| H | 1.70658600  | 2.79531900  | 4.17684400  |
| H | 5.48999600  | 2.89392800  | 2.15097100  |
| H | 4.16232300  | 2.44165000  | 4.19777800  |

|   |             |             |             |
|---|-------------|-------------|-------------|
| 6 |             |             |             |
| C | -1.13509000 | 3.65290700  | -0.49522900 |
| C | -1.69107900 | 2.42038000  | -0.29640500 |
| C | -0.88567000 | 1.24629100  | -0.15886500 |
| C | 0.54127600  | 1.37823100  | -0.24818300 |
| C | 1.08343200  | 2.68752500  | -0.45837900 |
| C | 0.28459600  | 3.77748900  | -0.58529500 |
| C | -1.46376100 | -0.01971700 | 0.05017500  |
| C | 1.36766900  | 0.24780700  | -0.12572000 |
| C | 0.78927700  | -1.01563300 | 0.09902600  |
| C | -0.63662200 | -1.14550800 | 0.19639200  |
| C | -1.17530500 | -2.44578600 | 0.46649900  |
| H | -2.24838300 | -2.55287300 | 0.56550800  |
| C | -0.37612100 | -3.53286500 | 0.60871100  |
| C | 1.04212200  | -3.41824100 | 0.47338000  |
| C | 1.59373900  | -2.19138400 | 0.22874500  |
| H | -2.76717900 | 2.31191700  | -0.25038800 |

|   |              |             |             |
|---|--------------|-------------|-------------|
| H | 2.15866400   | 2.80232400  | -0.51414400 |
| H | 0.70900800   | 4.76087100  | -0.75120400 |
| H | 2.66664300   | -2.08343000 | 0.14894500  |
| C | -7.22168200  | -0.73476000 | 0.24792200  |
| C | -8.04774700  | 0.22089700  | 0.87286900  |
| C | -7.80956100  | -1.86467400 | -0.31834900 |
| C | -9.42310700  | 0.07716900  | 0.94661700  |
| H | -7.59283800  | 1.11385500  | 1.28956400  |
| C | -9.19017000  | -2.03400800 | -0.25897000 |
| H | -7.18929900  | -2.62279800 | -0.78704700 |
| C | -9.99213300  | -1.06314800 | 0.37944600  |
| H | -10.03031100 | 0.83990300  | 1.42226100  |
| C | -10.09168600 | -3.06380500 | -0.73050600 |
| C | -11.39165300 | -2.65898400 | -0.35492000 |
| C | -9.91257600  | -4.26169100 | -1.42244800 |
| C | -12.51203100 | -3.42903900 | -0.66885700 |
| C | -11.02237700 | -5.03302600 | -1.73251900 |
| H | -8.91761900  | -4.58430100 | -1.71508700 |
| C | -12.30731000 | -4.61571300 | -1.35755900 |
| H | -13.51263900 | -3.11591200 | -0.39044600 |
| H | -10.89835300 | -5.96671200 | -2.27144500 |
| H | -13.16349700 | -5.23244600 | -1.61305500 |
| C | 7.12877600   | 0.83019400  | -0.56266000 |
| C | 7.81051300   | 0.35328200  | -1.70090900 |
| C | 7.86321800   | 1.43918900  | 0.45373700  |
| C | 9.18335900   | 0.46677800  | -1.84533200 |
| H | 7.24374600   | -0.13844400 | -2.48514700 |
| C | 9.24442300   | 1.56586500  | 0.33444400  |
| H | 7.35627400   | 1.83332000  | 1.32933400  |
| C | 9.89993200   | 1.08213000  | -0.81897800 |
| H | 9.67586200   | 0.07675800  | -2.72956200 |
| C | 10.27191200  | 2.13280600  | 1.18197900  |
| C | 11.49475300  | 1.95823900  | 0.49744300  |
| C | 10.26034100  | 2.75579300  | 2.43006200  |
| C | 12.70341500  | 2.38828200  | 1.04591700  |
| C | 11.45824500  | 3.18947500  | 2.97741000  |
| H | 9.32609300   | 2.89754100  | 2.96554400  |
| C | 12.66517300  | 3.00452900  | 2.28812900  |
| H | 13.64504200  | 2.24675100  | 0.52618600  |
| H | 11.46473100  | 3.67479700  | 3.94797900  |
| H | 13.59247000  | 3.34835100  | 2.73597600  |
| N | 11.25550700  | 1.33560100  | -0.71740700 |
| N | -11.31715900 | -1.45576900 | 0.32892500  |
| C | 12.26940400  | 0.92810200  | -1.67274500 |
| C | 12.83389700  | -0.46115300 | -1.39286500 |
| H | 13.06513700  | 1.67767500  | -1.65654900 |
| H | 11.82521800  | 0.97003700  | -2.67072800 |
| H | 13.59155200  | -0.71864500 | -2.13873600 |
| H | 13.29851900  | -0.50060200 | -0.40355900 |
| H | 12.04438500  | -1.21715900 | -1.42983700 |
| C | -12.44645100 | -0.68723100 | 0.81931500  |
| C | -13.00056100 | 0.29015100  | -0.21260700 |
| H | -12.12445100 | -0.15619900 | 1.71919700  |
| H | -13.21930500 | -1.39251600 | 1.13594400  |
| H | -13.84699800 | 0.84242700  | 0.20600500  |
| H | -12.23605000 | 1.01109400  | -0.51586000 |

|   |              |             |             |
|---|--------------|-------------|-------------|
| H | -13.34390500 | -0.23973200 | -1.10563700 |
| H | -0.79613300  | -4.50711600 | 0.82849600  |
| C | 2.84920300   | 0.39183300  | -0.23645500 |
| C | 3.45322200   | 0.64626200  | -1.46959800 |
| C | 3.67056300   | 0.28406200  | 0.88790700  |
| C | 4.82946800   | 0.79339100  | -1.57366200 |
| H | 2.83498000   | 0.74041700  | -2.35730200 |
| C | 5.04815300   | 0.42011200  | 0.78091100  |
| H | 3.22510900   | 0.08222000  | 1.85754500  |
| C | 5.65665200   | 0.68079100  | -0.45132300 |
| H | 5.26576100   | 1.01659200  | -2.54207100 |
| H | 5.66218800   | 0.30497400  | 1.66851000  |
| C | -2.94696000  | -0.17968300 | 0.10343700  |
| C | -3.63579600  | -0.74174900 | -0.97434700 |
| C | -3.68226200  | 0.20811700  | 1.22462400  |
| C | -5.01215400  | -0.91367000 | -0.93058300 |
| H | -3.08528400  | -1.04072800 | -1.86134700 |
| C | -5.05874600  | 0.02875800  | 1.27009100  |
| H | -3.17151600  | 0.64903000  | 2.07541000  |
| C | -5.75195600  | -0.53752300 | 0.19570100  |
| H | -5.52318600  | -1.32916700 | -1.79342300 |
| H | -5.59939900  | 0.31707000  | 2.16560800  |
| C | 1.83994000   | -4.63690800 | 0.68321100  |
| N | 1.44507500   | -5.60088700 | 1.48052100  |
| N | 3.07838800   | -4.88719900 | 0.11609800  |
| C | 2.45297900   | -6.54349400 | 1.45570400  |
| C | 3.48695200   | -6.11961900 | 0.60674700  |
| C | 3.76136400   | -4.17666200 | -0.91732200 |
| C | 2.55187200   | -7.77051600 | 2.11810900  |
| C | 4.62507500   | -6.88774600 | 0.37158100  |
| C | 3.18720000   | -4.06329700 | -2.18021200 |
| C | 5.01980700   | -3.64090500 | -0.65992000 |
| C | 3.68301900   | -8.53759400 | 1.89837900  |
| H | 1.75800200   | -8.10302200 | 2.77877800  |
| C | 4.70425100   | -8.10232100 | 1.03432600  |
| H | 5.41155400   | -6.55293200 | -0.29567400 |
| C | 3.87517700   | -3.39734800 | -3.18691100 |
| H | 2.21049100   | -4.49684700 | -2.36634600 |
| C | 5.70760400   | -2.98730400 | -1.67617600 |
| H | 5.44901600   | -3.73292600 | 0.33223200  |
| H | 3.78703800   | -9.49507500 | 2.39884600  |
| H | 5.57508400   | -8.73224900 | 0.88323300  |
| C | 5.13587200   | -2.86279400 | -2.93807200 |
| H | 3.42777700   | -3.30460700 | -4.17111400 |
| H | 6.68701300   | -2.56547500 | -1.47585100 |
| H | 5.67255600   | -2.34934400 | -3.72954800 |
| C | -1.93795500  | 4.87311900  | -0.67899500 |
| N | -1.62228600  | 5.79636300  | -1.55328200 |
| N | -3.09909200  | 5.16589100  | 0.01776200  |
| C | -2.60816900  | 6.75845300  | -1.45083300 |
| C | -3.54310400  | 6.38885000  | -0.47143700 |
| C | -3.64479400  | 4.51585000  | 1.16441700  |
| C | -2.76088600  | 7.96086300  | -2.14650900 |
| C | -4.62778200  | 7.19573300  | -0.13398400 |
| C | -4.98617300  | 4.14401400  | 1.16348700  |
| C | -2.85515900  | 4.30613700  | 2.29245400  |

|   |              |             |             |
|---|--------------|-------------|-------------|
| C | -3.84275900  | 8.76317200  | -1.82726600 |
| H | -2.04322000  | 8.24856900  | -2.90768800 |
| C | -4.76093100  | 8.38625600  | -0.83096400 |
| H | -5.33492000  | 6.91008100  | 0.63649900  |
| C | -5.54087900  | 3.57156000  | 2.30298500  |
| H | -5.58716100  | 4.30292300  | 0.27455400  |
| C | -3.41125900  | 3.71072500  | 3.41778400  |
| H | -1.81546500  | 4.61407600  | 2.28584800  |
| H | -3.98668000  | 9.70306700  | -2.35061300 |
| H | -5.59407600  | 9.04298800  | -0.60176800 |
| C | -4.75565800  | 3.34927000  | 3.42902200  |
| H | -6.59089900  | 3.29715200  | 2.30657700  |
| H | -2.79469300  | 3.54553600  | 4.29529400  |
| H | -5.19010600  | 2.89889400  | 4.31560100  |
| 7 |              |             |             |
| C | 0.14899300   | -0.78365500 | 3.29290000  |
| C | -0.54553700  | -0.85371900 | 2.12411000  |
| C | 0.11073100   | -0.74494300 | 0.85507300  |
| C | 1.53860200   | -0.59215000 | 0.84045000  |
| C | 2.22654100   | -0.51370700 | 2.09504900  |
| C | 1.55979600   | -0.60072300 | 3.27812200  |
| C | -0.60265500  | -0.79995700 | -0.35278600 |
| C | 2.22586400   | -0.53084300 | -0.38259400 |
| C | 1.51393300   | -0.62017200 | -1.59126800 |
| C | 0.08490000   | -0.75075400 | -1.57616900 |
| C | -0.60450000  | -0.82226300 | -2.82841600 |
| H | -1.68484900  | -0.90357700 | -2.81971200 |
| C | 0.06745100   | -0.78455300 | -4.01107000 |
| C | 1.48489900   | -0.66636500 | -4.02671500 |
| C | 2.17957000   | -0.58418900 | -2.85933700 |
| H | -0.37078200  | -0.87506100 | 4.24162600  |
| H | -1.61753900  | -1.01157500 | 2.13956100  |
| H | 3.30244300   | -0.38487100 | 2.08611600  |
| H | 2.10299500   | -0.53938500 | 4.21583900  |
| H | 2.01056500   | -0.63865900 | -4.97613000 |
| H | 3.25900600   | -0.49052600 | -2.87440400 |
| C | -6.34401100  | -1.71087300 | -0.22419500 |
| C | -6.86271800  | -2.84769500 | 0.42750800  |
| C | -7.22632700  | -0.82554500 | -0.84101100 |
| C | -8.22005700  | -3.11748000 | 0.47634300  |
| H | -6.17833200  | -3.52396300 | 0.92971000  |
| C | -8.59580800  | -1.07257500 | -0.80581900 |
| H | -6.84523500  | 0.04446200  | -1.36736600 |
| C | -9.08742800  | -2.22263700 | -0.15048300 |
| H | -8.58681600  | -3.99439300 | 0.99896600  |
| C | -9.75028700  | -0.37647200 | -1.33304800 |
| C | -10.87929500 | -1.14091300 | -0.96496500 |
| C | -9.91892400  | 0.79922400  | -2.06459500 |
| C | -12.17126500 | -0.74216700 | -1.30911700 |
| C | -11.20053700 | 1.19730900  | -2.41344600 |
| H | -9.05822200  | 1.39437000  | -2.35548300 |
| C | -12.31233200 | 0.43083100  | -2.03610100 |
| H | -13.04086800 | -1.32214200 | -1.01899100 |
| H | -11.34723100 | 2.11012600  | -2.98163000 |

|   |              |             |             |
|---|--------------|-------------|-------------|
| H | -13.30754800 | 0.76215000  | -2.31620700 |
| C | 8.00423600   | 0.04559200  | -0.45787100 |
| C | 8.61312100   | 1.04073100  | -1.24889500 |
| C | 8.81297300   | -0.79861200 | 0.30127300  |
| C | 9.98661200   | 1.21114300  | -1.29778300 |
| H | 7.98635300   | 1.68109800  | -1.86121800 |
| C | 10.19695600  | -0.64998300 | 0.26949200  |
| H | 8.36283700   | -1.55897900 | 0.93255900  |
| C | 10.77870700  | 0.35980700  | -0.52738700 |
| H | 10.42247400  | 1.97773000  | -1.92947600 |
| C | 11.29111500  | -1.33938100 | 0.92005300  |
| C | 12.47704400  | -0.71213800 | 0.47835800  |
| C | 11.36487200  | -2.40763500 | 1.81399600  |
| C | 13.73191100  | -1.14396700 | 0.90918700  |
| C | 12.60940300  | -2.83712300 | 2.24944700  |
| H | 10.45977200  | -2.89654700 | 2.16242600  |
| C | 13.77829400  | -2.20841600 | 1.79760500  |
| H | 14.64483100  | -0.67096600 | 0.56331400  |
| H | 12.68217000  | -3.66784100 | 2.94388300  |
| H | 14.74308000  | -2.56256500 | 2.14758900  |
| N | 12.15393500  | 0.32369700  | -0.38363000 |
| N | -10.46479900 | -2.26240000 | -0.26397000 |
| C | 13.10246100  | 1.15962900  | -1.09626100 |
| C | 13.53252200  | 0.57103300  | -2.43628800 |
| H | 13.96836700  | 1.31255300  | -0.44660200 |
| H | 12.64347900  | 2.14192900  | -1.23650000 |
| H | 14.24443000  | 1.23801700  | -2.93130200 |
| H | 14.01227600  | -0.40210700 | -2.29823300 |
| H | 12.67101900  | 0.43690400  | -3.09662000 |
| C | -11.33606400 | -3.25864100 | 0.33190000  |
| C | -11.77327600 | -2.90285500 | 1.74929600  |
| H | -10.80741000 | -4.21549700 | 0.32014300  |
| H | -12.20477800 | -3.37694900 | -0.32116000 |
| H | -12.42579800 | -3.68363500 | 2.15090900  |
| H | -10.90772400 | -2.80471100 | 2.41066700  |
| H | -12.32186000 | -1.95676000 | 1.76176400  |
| H | -0.47667400  | -0.84057000 | -4.94869900 |
| C | 3.71236400   | -0.38122600 | -0.39966900 |
| C | 4.30630300   | 0.88002400  | -0.47321100 |
| C | 4.54601700   | -1.49980700 | -0.34590500 |
| C | 5.68816400   | 1.01790500  | -0.48946200 |
| H | 3.67704400   | 1.76436200  | -0.50866700 |
| C | 5.92751500   | -1.36187800 | -0.36929900 |
| H | 4.10573100   | -2.49134600 | -0.29686400 |
| C | 6.52741400   | -0.10013000 | -0.43935900 |
| H | 6.12155200   | 2.01267900  | -0.52125300 |
| H | 6.55055000   | -2.25070100 | -0.35398100 |
| C | -2.08841000  | -0.97511400 | -0.33033100 |
| C | -2.99625500  | 0.08980600  | -0.18968000 |
| C | -2.60539000  | -2.26840100 | -0.42365000 |
| C | -4.36724800  | -0.17265200 | -0.15045800 |
| C | -3.96945000  | -2.51584400 | -0.38758600 |
| H | -1.91424400  | -3.09837500 | -0.53350400 |
| C | -4.88092600  | -1.46596100 | -0.25075600 |
| H | -5.05559000  | 0.65681400  | -0.03524600 |
| H | -4.32944800  | -3.53460600 | -0.48909300 |

|   |             |            |             |
|---|-------------|------------|-------------|
| C | -2.54142800 | 1.49673900 | -0.13824800 |
| N | -1.70049200 | 2.02625600 | -0.98904500 |
| N | -3.03581000 | 2.42076000 | 0.77153100  |
| C | -1.60902400 | 3.36052500 | -0.64259200 |
| C | -2.43827000 | 3.63159000 | 0.45646900  |
| C | -3.89533800 | 2.21403800 | 1.89306100  |
| C | -0.84926900 | 4.38544200 | -1.21337900 |
| C | -2.53231300 | 4.89788700 | 1.03009100  |
| C | -5.15051400 | 2.81669700 | 1.90986200  |
| C | -3.46393700 | 1.44933100 | 2.97219900  |
| C | -0.94101500 | 5.64935600 | -0.65612100 |
| H | -0.20744500 | 4.18332800 | -2.06453700 |
| C | -1.77041500 | 5.90075000 | 0.45217200  |
| H | -3.17098200 | 5.09022700 | 1.88521300  |
| C | -5.98171800 | 2.64156700 | 3.01014800  |
| H | -5.47019100 | 3.41157600 | 1.06045800  |
| C | -4.30603300 | 1.26782400 | 4.06316200  |
| H | -2.47281700 | 1.00981200 | 2.95448000  |
| H | -0.36196000 | 6.46476000 | -1.07795600 |
| H | -1.81433900 | 6.90379300 | 0.86460200  |
| C | -5.56338400 | 1.86304600 | 4.08472600  |
| H | -6.96060700 | 3.10946800 | 3.02310100  |
| H | -3.97295400 | 0.66695500 | 4.90318000  |
| H | -6.21614000 | 1.72272200 | 4.94017500  |

|   |             |             |             |
|---|-------------|-------------|-------------|
| 8 |             |             |             |
| C | 0.82465100  | -0.69795400 | 3.56055100  |
| C | 1.46256400  | -0.33431600 | 2.41421600  |
| C | 0.75180600  | -0.17418100 | 1.18055100  |
| C | -0.66855000 | -0.37791200 | 1.18485600  |
| C | -1.29742100 | -0.75645400 | 2.41397600  |
| C | -0.58051800 | -0.91993500 | 3.55873600  |
| C | 1.40716800  | 0.19016500  | -0.00690200 |
| C | -1.40721800 | -0.19004900 | 0.00663000  |
| C | -0.75185800 | 0.17430900  | -1.18082000 |
| C | 0.66849900  | 0.37803300  | -1.18512900 |
| C | 1.29737000  | 0.75657500  | -2.41425100 |
| H | 2.37054900  | 0.90542300  | -2.42011100 |
| C | 0.58046400  | 0.92007200  | -3.55900700 |
| C | -0.82471000 | 0.69812300  | -3.56081300 |
| C | -1.46262300 | 0.33448500  | -2.41447700 |
| H | 1.38483100  | -0.80826700 | 4.48401900  |
| H | 2.52914300  | -0.14309100 | 2.42503900  |
| H | -2.37059800 | -0.90531500 | 2.41983200  |
| H | -1.07993600 | -1.20661900 | 4.47881300  |
| H | -1.38489600 | 0.80846700  | -4.48427200 |
| H | -2.52920700 | 0.14328600  | -2.42529800 |
| C | 7.10686000  | 1.32860100  | 0.14040400  |
| C | 7.60631300  | 2.29195100  | 1.03965500  |
| C | 7.99679100  | 0.67044100  | -0.70649800 |
| C | 8.95228600  | 2.60892900  | 1.11169200  |
| H | 6.91716200  | 2.78600200  | 1.71708200  |
| C | 9.35533000  | 0.97018800  | -0.65435900 |
| H | 7.62862000  | -0.05948000 | -1.42122600 |
| C | 9.82728500  | 1.94373900  | 0.25284500  |

|   |              |             |             |
|---|--------------|-------------|-------------|
| H | 9.30557200   | 3.34467700  | 1.82604400  |
| C | 10.51361600  | 0.48750900  | -1.37611000 |
| C | 11.62526000  | 1.19226400  | -0.86380500 |
| C | 10.69830600  | -0.45769800 | -2.38523000 |
| C | 12.91618100  | 0.95853600  | -1.33874600 |
| C | 11.97867600  | -0.69002100 | -2.86420900 |
| H | 9.85098800   | -1.00436500 | -2.78878200 |
| C | 13.07332500  | 0.01346900  | -2.34206000 |
| H | 13.77318000  | 1.49125200  | -0.94051600 |
| H | 12.13781700  | -1.42297800 | -3.64846600 |
| H | 14.06808400  | -0.18589200 | -2.72859200 |
| C | -7.10689300  | -1.32855000 | -0.14080800 |
| C | -7.60637300  | -2.29159200 | -1.04037200 |
| C | -7.99678700  | -0.67070400 | 0.70637700  |
| C | -8.95234600  | -2.60856300 | -1.11245200 |
| H | -6.91724300  | -2.78539500 | -1.71800100 |
| C | -9.35532300  | -0.97046500 | 0.65421300  |
| H | -7.62858400  | 0.05897300  | 1.42133800  |
| C | -9.82730700  | -1.94369800 | -0.25331800 |
| H | -9.30566000  | -3.34406200 | -1.82704900 |
| C | -10.51357600 | -0.48808300 | 1.37621400  |
| C | -11.62523400 | -1.19267900 | 0.86371800  |
| C | -10.69822700 | 0.45673800  | 2.38570300  |
| C | -12.91612900 | -0.95917000 | 1.33883600  |
| C | -11.97857000 | 0.68884100  | 2.86485700  |
| H | -9.85089800  | 1.00327900  | 2.78940400  |
| C | -13.07323300 | -0.01448600 | 2.34251800  |
| H | -13.77313900 | -1.49176600 | 0.94046900  |
| H | -12.13768100 | 1.42149600  | 3.64940200  |
| H | -14.06797200 | 0.18469700  | 2.72919400  |
| N | -11.19572100 | -2.08054100 | -0.10992200 |
| N | 11.19570900  | 2.08050000  | 0.10947800  |
| C | -12.04999800 | -2.93585600 | -0.91328900 |
| C | -12.56059200 | -2.25530100 | -2.17936400 |
| H | -12.88478400 | -3.25982200 | -0.28607800 |
| H | -11.48244700 | -3.83653100 | -1.16216600 |
| H | -13.19744600 | -2.94069300 | -2.74624900 |
| H | -13.14693900 | -1.36522200 | -1.93403200 |
| H | -11.72832800 | -1.95030600 | -2.82014100 |
| C | 12.04996100  | 2.93609600  | 0.91257200  |
| C | 12.56052900  | 2.25598500  | 2.17889600  |
| H | 11.48239800  | 3.83685300  | 1.16112400  |
| H | 12.88476100  | 3.25985300  | 0.28526900  |
| H | 13.19736300  | 2.94157900  | 2.74555800  |
| H | 11.72825100  | 1.95120700  | 2.81975800  |
| H | 13.14688900  | 1.36582500  | 1.93389000  |
| H | 1.07988100   | 1.20675300  | -4.47908500 |
| C | -2.88410200  | -0.42891700 | -0.00343500 |
| C | -3.34388000  | -1.73144500 | -0.20494800 |
| C | -3.83923100  | 0.59247100  | 0.14703800  |
| C | -4.69727900  | -2.03019700 | -0.25245200 |
| H | -2.61567400  | -2.52806300 | -0.32178900 |
| C | -5.19913500  | 0.27941100  | 0.09386700  |
| C | -5.65518900  | -1.02443600 | -0.10236800 |
| H | -5.01163000  | -3.06023500 | -0.38679900 |
| H | -5.92469400  | 1.07739800  | 0.20424900  |

|   |             |             |             |
|---|-------------|-------------|-------------|
| C | 2.88405500  | 0.42901100  | 0.00314900  |
| C | 3.83916800  | -0.59242700 | -0.14708600 |
| C | 3.34385200  | 1.73157700  | 0.20437000  |
| C | 5.19907500  | -0.27937900 | -0.09395200 |
| C | 4.69725500  | 2.03031700  | 0.25182700  |
| H | 2.61565800  | 2.52823400  | 0.32101700  |
| C | 5.65515200  | 1.02450500  | 0.10199500  |
| H | 5.92461900  | -1.07740700 | -0.20413700 |
| H | 5.01161600  | 3.06038300  | 0.38593800  |
| C | 3.44409800  | -1.99293100 | -0.41468500 |
| N | 2.58891400  | -2.35040100 | -1.33793000 |
| N | 4.01517200  | -3.07814000 | 0.23523600  |
| C | 2.56715800  | -3.73155700 | -1.31225700 |
| C | 3.45397600  | -4.21015100 | -0.33570200 |
| C | 4.90968600  | -3.09712400 | 1.34831200  |
| C | 1.82599200  | -4.63148200 | -2.08312200 |
| C | 3.62444500  | -5.56909100 | -0.07959400 |
| C | 6.18875400  | -3.62307900 | 1.18601700  |
| C | 4.48925400  | -2.63110900 | 2.58987500  |
| C | 1.99342800  | -5.98445800 | -1.84232100 |
| H | 1.14055900  | -4.26839200 | -2.84180900 |
| C | 2.87970400  | -6.44607000 | -0.85194400 |
| H | 4.30717300  | -5.92383300 | 0.68474400  |
| C | 7.05448900  | -3.67065700 | 2.27251100  |
| H | 6.49942100  | -3.98451000 | 0.21111300  |
| C | 5.36528500  | -2.66962600 | 3.66842600  |
| H | 3.48046600  | -2.25048500 | 2.70507400  |
| H | 1.43049800  | -6.70659300 | -2.42523500 |
| H | 2.98243700  | -7.51421900 | -0.68873400 |
| C | 6.64640800  | -3.18929600 | 3.51250500  |
| H | 8.05200100  | -4.07858800 | 2.14640200  |
| H | 5.04053300  | -2.30103800 | 4.63604800  |
| H | 7.32590500  | -3.22193500 | 4.35796900  |
| C | -3.44419700 | 1.99293200  | 0.41492900  |
| N | -2.58918700 | 2.35025700  | 1.33838900  |
| N | -4.01515400 | 3.07824300  | -0.23492600 |
| C | -2.56745800 | 3.73141900  | 1.31296600  |
| C | -3.45410700 | 4.21016700  | 0.33633200  |
| C | -4.90945000 | 3.09739700  | -1.34817000 |
| C | -1.82646000 | 4.63122200  | 2.08413300  |
| C | -3.62456400 | 5.56915000  | 0.08044200  |
| C | -4.48871900 | 2.63176300  | -2.58977600 |
| C | -6.18862900 | 3.62310900  | -1.18597400 |
| C | -1.99388600 | 5.98423800  | 1.84354800  |
| H | -1.14116200 | 4.26801200  | 2.84288500  |
| C | -2.87998800 | 6.44600800  | 0.85309000  |
| H | -4.30715000 | 5.92401400  | -0.68396500 |
| C | -5.36455600 | 2.67042600  | -3.66847700 |
| H | -3.47985300 | 2.25132100  | -2.70489000 |
| C | -7.05417000 | 3.67084000  | -2.27261700 |
| H | -6.49953800 | 3.98422800  | -0.21103200 |
| H | -1.43108200 | 6.70628000  | 2.42669900  |
| H | -2.98271400 | 7.51418300  | 0.69005200  |
| C | -6.64578600 | 3.18986600  | -3.51266000 |
| H | -5.03957000 | 2.30213600  | -4.63613300 |
| H | -8.05176800 | 4.07858500  | -2.14658600 |



|   |              |             |             |
|---|--------------|-------------|-------------|
| H | -7.32513200  | 3.22262100  | -4.35824200 |
| 9 |              |             |             |
| C | 1.09533500   | 2.56193200  | 0.03780900  |
| C | 1.46147500   | 1.25008100  | -0.09726900 |
| C | 0.50584100   | 0.18958600  | -0.16107700 |
| C | -0.88917700  | 0.51604200  | -0.08474700 |
| C | -1.24267300  | 1.89652200  | 0.05698300  |
| C | -0.29900500  | 2.87249900  | 0.11345700  |
| C | 0.90621100   | -1.15247600 | -0.29270300 |
| C | -1.85965300  | -0.49965600 | -0.12474300 |
| C | -1.45738300  | -1.84356300 | -0.23458600 |
| C | -0.06185800  | -2.16798500 | -0.33163200 |
| C | 0.30051700   | -3.54477800 | -0.49159200 |
| H | 1.34982700   | -3.79758700 | -0.58346700 |
| C | -0.63574600  | -4.52616600 | -0.53546700 |
| C | -2.02409100  | -4.21333400 | -0.40941800 |
| C | -2.41080700  | -2.90913400 | -0.27561000 |
| H | 2.51080800   | 0.99397000  | -0.17871600 |
| H | -2.29055300  | 2.15906600  | 0.13657400  |
| H | -0.60423700  | 3.90497200  | 0.24886200  |
| H | -3.46208500  | -2.65830000 | -0.21378300 |
| C | 6.53649200   | -2.51685900 | -0.68492400 |
| C | 7.40077400   | -1.76362800 | -1.50469700 |
| C | 7.05384700   | -3.60054000 | 0.02277000  |
| C | 8.74640300   | -2.06363600 | -1.63489500 |
| H | 7.00415000   | -0.90401700 | -2.03542200 |
| C | 8.40334400   | -3.92426000 | -0.09017600 |
| H | 6.39972400   | -4.20509900 | 0.64395300  |
| C | 9.24410600   | -3.15631300 | -0.92496100 |
| H | 9.38635500   | -1.45409500 | -2.26374400 |
| C | 9.23422900   | -4.96054700 | 0.48564400  |
| C | 10.53424700  | -4.76193000 | -0.02950100 |
| C | 8.99378400   | -6.01207800 | 1.37013800  |
| C | 11.59521200  | -5.59213800 | 0.33337000  |
| C | 10.04378700  | -6.84329300 | 1.72997400  |
| H | 7.99804600   | -6.17642000 | 1.77155200  |
| C | 11.33007500  | -6.63050000 | 1.21426200  |
| H | 12.59650800  | -5.43571400 | -0.05359200 |
| H | 9.87162600   | -7.66494200 | 2.41763900  |
| H | 12.13911900  | -7.29071300 | 1.51137600  |
| C | -7.46868300  | 0.97977000  | 0.11851000  |
| C | -8.38707800  | 0.20963900  | 0.85992700  |
| C | -7.92651000  | 2.11579700  | -0.54690200 |
| C | -9.72783500  | 0.54266100  | 0.95454400  |
| H | -8.03642700  | -0.69032100 | 1.35505100  |
| C | -9.26978900  | 2.47354700  | -0.46891500 |
| H | -7.23151600  | 2.73374900  | -1.10749000 |
| C | -10.16549100 | 1.68725300  | 0.28817000  |
| H | -10.40960600 | -0.08107200 | 1.52253200  |
| C | -10.04646100 | 3.56492500  | -1.01796100 |
| C | -11.37135000 | 3.37863200  | -0.56570000 |
| C | -9.74047900  | 4.65510800  | -1.83272000 |
| C | -12.39279400 | 4.25933100  | -0.92272300 |
| C | -10.75107900 | 5.53623200  | -2.18650800 |

|   |              |             |             |
|---|--------------|-------------|-------------|
| H | -8.72508400  | 4.81032500  | -2.18566200 |
| C | -12.06274600 | 5.33534700  | -1.73371000 |
| H | -13.41292000 | 4.11242000  | -0.58425900 |
| H | -10.52803500 | 6.38813400  | -2.82064600 |
| H | -12.83993000 | 6.03512600  | -2.02522100 |
| N | -11.42817000 | 2.24872700  | 0.23453000  |
| N | 10.52467800  | -3.67760500 | -0.89224900 |
| C | -12.62800900 | 1.70132100  | 0.84025900  |
| C | -13.38121500 | 0.74327100  | -0.07727100 |
| H | -13.26804400 | 2.53862400  | 1.13162900  |
| H | -12.33600700 | 1.19862100  | 1.76603200  |
| H | -14.27556600 | 0.36342900  | 0.42529100  |
| H | -13.69223800 | 1.24780500  | -0.99645100 |
| H | -12.75279100 | -0.10897100 | -0.35124800 |
| C | 11.68268100  | -3.12504300 | -1.57048600 |
| C | 12.42504700  | -2.08348100 | -0.73925400 |
| H | 11.34252500  | -2.69304800 | -2.51541100 |
| H | 12.34603200  | -3.95435400 | -1.83043100 |
| H | 13.28813300  | -1.70287700 | -1.29326600 |
| H | 11.77211100  | -1.23977200 | -0.49827800 |
| H | 12.78307300  | -2.51729200 | 0.19874500  |
| H | -0.34897400  | -5.56288700 | -0.66787100 |
| C | -3.30787600  | -0.14279200 | -0.06243800 |
| C | -4.04874800  | -0.32126200 | 1.10697200  |
| C | -3.95522900  | 0.39792100  | -1.17613900 |
| C | -5.38841200  | 0.04003000  | 1.16359300  |
| H | -3.57016900  | -0.74135400 | 1.98653100  |
| C | -5.29619900  | 0.75194300  | -1.12053000 |
| H | -3.40144500  | 0.53560500  | -2.10004600 |
| C | -6.03951000  | 0.58606700  | 0.05301500  |
| H | -5.93049600  | -0.08645400 | 2.09503800  |
| H | -5.77879600  | 1.14627200  | -2.00932500 |
| C | 2.35605400   | -1.49735600 | -0.39112400 |
| C | 3.06537700   | -1.94510300 | 0.72504700  |
| C | 3.03900700   | -1.38355600 | -1.60366000 |
| C | 4.41280000   | -2.26788000 | 0.63169700  |
| H | 2.55692200   | -2.03286400 | 1.68064600  |
| C | 4.38507300   | -1.71112800 | -1.69749200 |
| H | 2.50573600   | -1.04489500 | -2.48696400 |
| C | 5.09969300   | -2.16039600 | -0.58206500 |
| H | 4.94501800   | -2.59023900 | 1.52125900  |
| H | 4.88302100   | -1.63859400 | -2.65933400 |
| C | -2.98142200  | -5.32779400 | -0.49965200 |
| N | -2.80522400  | -6.34018300 | -1.31256800 |
| N | -4.15724200  | -5.42066500 | 0.22762800  |
| C | -3.90489000  | -7.15652600 | -1.13480100 |
| C | -4.76553800  | -6.60449600 | -0.17328600 |
| C | -4.59528600  | -4.62737400 | 1.32943700  |
| C | -4.22519700  | -8.37119400 | -1.74686100 |
| C | -5.93989600  | -7.23856000 | 0.22731200  |
| C | -3.76978000  | -4.45075400 | 2.43726400  |
| C | -5.87388300  | -4.07742300 | 1.30790400  |
| C | -5.39628400  | -9.00254200 | -1.36447100 |
| H | -3.56504500  | -8.79908000 | -2.49409600 |
| C | -6.23942300  | -8.44434900 | -0.38716000 |
| H | -6.59011600  | -6.81268400 | 0.98310500  |

|   |             |             |             |
|---|-------------|-------------|-------------|
| C | -4.22503700 | -3.70962900 | 3.52060600  |
| H | -2.78156600 | -4.89702700 | 2.44793200  |
| C | -6.33029400 | -3.35715600 | 2.40645500  |
| H | -6.50274900 | -4.21390300 | 0.43466800  |
| H | -5.67080400 | -9.94748800 | -1.82242200 |
| H | -7.14683600 | -8.96964900 | -0.10671200 |
| C | -5.50730500 | -3.16751400 | 3.51129400  |
| H | -3.58029600 | -3.57042300 | 4.38224500  |
| H | -7.33286300 | -2.94176100 | 2.39442900  |
| H | -5.86455400 | -2.60188900 | 4.36574000  |
| C | 2.10542500  | 3.64221400  | 0.11293900  |
| C | 1.86694700  | 4.89965600  | -0.45178500 |
| C | 3.33567800  | 3.44411700  | 0.74938700  |
| C | 2.81630500  | 5.90850600  | -0.40035400 |
| H | 0.93475400  | 5.08675200  | -0.97566000 |
| C | 4.28386200  | 4.45180200  | 0.82217200  |
| H | 3.54254600  | 2.49293100  | 1.22966300  |
| C | 4.04051800  | 5.70171800  | 0.24303900  |
| H | 2.61208600  | 6.86537700  | -0.86775900 |
| H | 5.21902000  | 4.27551300  | 1.34196600  |
| N | 5.00605200  | 6.73042100  | 0.31039700  |
| C | 4.60285000  | 8.07768400  | 0.49844700  |
| C | 6.38607700  | 6.42292900  | 0.19227400  |
| C | 3.61049100  | 8.39920300  | 1.42859200  |
| C | 5.19853700  | 9.10268500  | -0.24146900 |
| C | 7.31945900  | 7.02663200  | 1.03919800  |
| C | 6.83172100  | 5.51758400  | -0.77473400 |
| C | 3.21700200  | 9.71968800  | 1.60444600  |
| H | 3.14976700  | 7.60924400  | 2.01188600  |
| C | 4.81300500  | 10.42279700 | -0.04618000 |
| H | 5.96556800  | 8.85882400  | -0.96860500 |
| C | 8.67165000  | 6.73482300  | 0.91296100  |
| H | 6.97942700  | 7.72596600  | 1.79543000  |
| C | 8.18349200  | 5.21658500  | -0.88209200 |
| H | 6.11347600  | 5.05107700  | -1.44036500 |
| C | 3.81768000  | 10.73971400 | 0.87298400  |
| H | 2.44388400  | 9.95225900  | 2.33039900  |
| H | 5.28693600  | 11.20723200 | -0.62829800 |
| C | 9.11215300  | 5.82547600  | -0.04363500 |
| H | 9.38361500  | 7.21365400  | 1.57826800  |
| H | 8.51268200  | 4.51005300  | -1.63790500 |
| H | 3.51336100  | 11.77117300 | 1.01818100  |
| H | 10.16837100 | 5.59387000  | -0.13498300 |

10

|   |             |             |             |
|---|-------------|-------------|-------------|
| C | -0.67493900 | -1.25676900 | -3.60367700 |
| C | -1.45840800 | -1.03799300 | -2.51216000 |
| C | -0.89301900 | -0.83450500 | -1.21072500 |
| C | 0.53638600  | -0.87324400 | -1.07892800 |
| C | 1.32080300  | -1.09193900 | -2.25784400 |
| C | 0.74125100  | -1.27970800 | -3.47528000 |
| C | -1.69655500 | -0.57134300 | -0.08840900 |
| C | 1.13194200  | -0.67884300 | 0.17710200  |
| C | 0.33128800  | -0.40810800 | 1.29825100  |
| C | -1.09655300 | -0.35690200 | 1.16536200  |

|   |              |             |             |
|---|--------------|-------------|-------------|
| C | -1.87666500  | -0.09918500 | 2.33865400  |
| H | -2.95596300  | -0.07467500 | 2.24831300  |
| C | -1.29080600  | 0.10738900  | 3.54951600  |
| C | 0.12477100   | 0.06279900  | 3.67861400  |
| C | 0.90344000   | -0.19163100 | 2.59227500  |
| H | -1.12850500  | -1.40549300 | -4.57849800 |
| H | -2.53660800  | -1.01081500 | -2.61726800 |
| H | 2.40073400   | -1.08589700 | -2.16818100 |
| H | 1.35841100   | -1.43568300 | -4.35463900 |
| H | 0.58073100   | 0.22348500  | 4.65055000  |
| H | 1.98084000   | -0.24016700 | 2.69570800  |
| C | -7.49265800  | -0.75253200 | -0.43622000 |
| C | -8.21079600  | 0.20893500  | -1.17535600 |
| C | -8.19648300  | -1.76019400 | 0.22118100  |
| C | -9.59237800  | 0.19013400  | -1.26955900 |
| H | -7.66204600  | 0.97742700  | -1.71022800 |
| C | -9.58586000  | -1.80260900 | 0.14267100  |
| H | -7.66279800  | -2.49935800 | 0.81106400  |
| C | -10.27952700 | -0.82179600 | -0.59908200 |
| H | -10.11251400 | 0.93686100  | -1.85986600 |
| C | -10.59127400 | -2.68657200 | 0.69344500  |
| C | -11.83978300 | -2.19492300 | 0.25250500  |
| C | -10.54088100 | -3.82368100 | 1.49977800  |
| C | -13.03391600 | -2.82838700 | 0.59820200  |
| C | -11.72522700 | -4.45397100 | 1.85038800  |
| H | -9.58689400  | -4.21029400 | 1.84636500  |
| C | -12.95687900 | -3.95735600 | 1.40070400  |
| H | -13.99350100 | -2.45888400 | 0.25249400  |
| H | -11.70126200 | -5.34018800 | 2.47623000  |
| H | -13.87241500 | -4.46779100 | 1.68347400  |
| C | 6.93096100   | -0.54490800 | 0.56517900  |
| C | 7.62225100   | -1.40708200 | 1.43954600  |
| C | 7.65911600   | 0.35700100  | -0.20877500 |
| C | 9.00210700   | -1.39183800 | 1.55551500  |
| H | 7.05424100   | -2.08990200 | 2.06327100  |
| C | 9.04735300   | 0.39255700  | -0.11191400 |
| H | 7.14573000   | 1.01695000  | -0.90176100 |
| C | 9.71468100   | -0.48771300 | 0.76771800  |
| H | 9.50139500   | -2.05872500 | 2.25015200  |
| C | 10.07412300  | 1.18155200  | -0.75897500 |
| C | 11.30784400  | 0.73850100  | -0.23351300 |
| C | 10.05366600  | 2.19975300  | -1.71223800 |
| C | 12.51684600  | 1.30375200  | -0.64019200 |
| C | 11.25285200  | 2.76160000  | -2.12338000 |
| H | 9.11144000   | 2.54814500  | -2.12511600 |
| C | 12.46962900  | 2.31476900  | -1.58887700 |
| H | 13.46487300  | 0.97180800  | -0.23053400 |
| H | 11.25227600  | 3.55540100  | -2.86330200 |
| H | 13.39706100  | 2.77068000  | -1.92157800 |
| N | 11.07887500  | -0.28102400 | 0.67691000  |
| N | -11.63955600 | -1.05868600 | -0.51516000 |
| C | 12.09250600  | -0.94488600 | 1.47611100  |
| C | 12.39746300  | -0.21803200 | 2.78205200  |
| H | 12.99500300  | -1.03531300 | 0.86551700  |
| H | 11.74859800  | -1.96364400 | 1.67300600  |
| H | 13.16482200  | -0.75756600 | 3.34488300  |

|   |              |             |             |
|---|--------------|-------------|-------------|
| H | 12.76243100  | 0.79458500  | 2.58810500  |
| H | 11.50166400  | -0.14496000 | 3.40525600  |
| C | -12.67494300 | -0.30228600 | -1.19501400 |
| C | -12.98507900 | -0.83011600 | -2.59218900 |
| H | -12.35159800 | 0.74107200  | -1.24045100 |
| H | -13.57037000 | -0.32165900 | -0.56796500 |
| H | -13.76878200 | -0.22633500 | -3.05908800 |
| H | -12.09656600 | -0.79164600 | -3.22887100 |
| H | -13.33010200 | -1.86709000 | -2.54939400 |
| H | -1.90369400  | 0.30109600  | 4.42433200  |
| C | 2.62233800   | -0.70173100 | 0.30358600  |
| C | 3.37284700   | -1.88124000 | 0.45815300  |
| C | 3.31198600   | 0.50997800  | 0.23465100  |
| C | 4.76516200   | -1.80759300 | 0.53950200  |
| C | 4.69473200   | 0.57006400  | 0.31905700  |
| H | 2.74283300   | 1.42698000  | 0.11742500  |
| C | 5.45097000   | -0.59439900 | 0.47290300  |
| H | 5.33167000   | -2.72488100 | 0.65250400  |
| H | 5.19041300   | 1.53490600  | 0.28565600  |
| C | -3.18710700  | -0.56100800 | -0.21655700 |
| C | -3.85633100  | -1.78475600 | -0.29533400 |
| C | -3.94919000  | 0.62193400  | -0.21749300 |
| C | -5.23871900  | -1.85748000 | -0.37201000 |
| H | -3.27188100  | -2.69998000 | -0.29497500 |
| C | -5.34191500  | 0.52861400  | -0.28310000 |
| C | -6.01165600  | -0.69341800 | -0.36248400 |
| H | -5.72013700  | -2.82656500 | -0.45609500 |
| H | -5.91900800  | 1.44796800  | -0.26630200 |
| C | -3.33592800  | 1.97512200  | -0.12166100 |
| C | -2.33980300  | 2.40221100  | -1.00391500 |
| C | -3.77728300  | 2.88010300  | 0.84762300  |
| C | -1.79430600  | 3.67391500  | -0.91198300 |
| H | -1.98215200  | 1.73108800  | -1.77717500 |
| C | -3.24757200  | 4.15898700  | 0.93834500  |
| H | -4.55113700  | 2.57738900  | 1.54672000  |
| C | -2.24097300  | 4.57158600  | 0.06201900  |
| H | -1.01654100  | 3.97859700  | -1.60371500 |
| H | -3.61082500  | 4.84293300  | 1.69763400  |
| N | -1.68609300  | 5.87042500  | 0.15945800  |
| C | -1.39511300  | 6.60794000  | -1.01546200 |
| C | -1.40385800  | 6.42646200  | 1.43266500  |
| C | -2.29247500  | 6.61643800  | -2.08735700 |
| C | -0.20751200  | 7.33798000  | -1.11980000 |
| C | -1.68936100  | 7.76885800  | 1.69832100  |
| C | -0.83534700  | 5.64144800  | 2.44003500  |
| C | -2.00014700  | 7.33259200  | -3.24104400 |
| H | -3.21922800  | 6.05800300  | -2.01125600 |
| C | 0.06865700   | 8.06681000  | -2.26957000 |
| H | 0.49696200   | 7.33154200  | -0.29514800 |
| C | -1.40155900  | 8.31383200  | 2.94312500  |
| H | -2.13674800  | 8.38218000  | 0.92359600  |
| C | -0.56809500  | 6.18930800  | 3.68815700  |
| H | -0.60537200  | 4.60048600  | 2.24023400  |
| C | -0.82152200  | 8.06569200  | -3.33894300 |
| H | -2.70819500  | 7.32672100  | -4.06417800 |
| H | 0.99546300   | 8.62890800  | -2.33283900 |

|   |             |             |             |
|---|-------------|-------------|-------------|
| C | -0.84396900 | 7.52832400  | 3.94723200  |
| H | -1.62879900 | 9.35871900  | 3.13156300  |
| H | -0.12732200 | 5.56473900  | 4.45920500  |
| H | -0.59935100 | 8.63021500  | -4.23869400 |
| H | -0.62701400 | 7.95495400  | 4.92115800  |
| C | 2.72114200  | -3.20271100 | 0.59156500  |
| N | 1.72093100  | -3.44823100 | 1.39824800  |
| N | 3.16800500  | -4.33940200 | -0.06801100 |
| C | 1.46802000  | -4.80099400 | 1.27945900  |
| C | 2.36340800  | -5.38111100 | 0.36798500  |
| C | 4.16507900  | -4.46268200 | -1.08264500 |
| C | 0.50327900  | -5.59146000 | 1.91021500  |
| C | 2.32760400  | -6.73523900 | 0.04150400  |
| C | 5.30508700  | -5.22086000 | -0.82875200 |
| C | 3.97788200  | -3.86115600 | -2.32299500 |
| C | 0.46371100  | -6.93974700 | 1.59878600  |
| C | 1.36333400  | -7.50271500 | 0.67510100  |
| C | 6.26754400  | -5.36679400 | -1.82104800 |
| H | 5.43389300  | -5.68455400 | 0.14385800  |
| C | 4.95126900  | -4.00018700 | -3.30553800 |
| H | 3.07102500  | -3.29781000 | -2.51305600 |
| C | 6.09509200  | -4.75238300 | -3.05739800 |
| H | 7.15669700  | -5.95657000 | -1.62368900 |
| H | 4.80910100  | -3.52681000 | -4.27159000 |
| H | 6.85059500  | -4.86241500 | -3.82853200 |
| H | -0.19043800 | -5.14915200 | 2.61759400  |
| H | -0.27526000 | -7.57818900 | 2.07252000  |
| H | 1.30042600  | -8.56330600 | 0.45304600  |
| H | 3.02024900  | -7.16843800 | -0.67173800 |
